# Supplementary material for: Feasibility of 2-D ultrasound shear wave elastography of fetal lungs in case of threatened preterm labour: a study protocol
Source: PubMed Central journal article supplement — BMJ Open. 2017 Dec 26;7(12):e018130. doi: 10.1136/bmjopen-2017-018130 (PMC5770838; doi:10.1136/bmjopen-2017-018130), 2017-12-26
Supplement: bmjopen-2017-018130.draft_revisions.pdf [file bmjopen-2017-018130.draft_revisions.pdf]

# BMJ Open

BMJ Open is committed to open peer review. As part of this commitment we make the peer review history of every article we publish publicly available.

When an article is published we post the peer reviewers' comments and the authors' responses online. We also post the versions of the paper that were used during peer review. These are the versions that the peer review comments apply to.

The versions of the paper that follow are the versions that were submitted during the peer review process. They are not the versions of record or the final published versions. They should not be cited or distributed as the published version of this manuscript.

BMJ Open is an open access journal and the full, final, typeset and author-corrected version of record of the manuscript is available on our site with no access controls, subscription charges or pay-per-view fees (<http://bmjopen.bmj.com>).

If you have any questions on BMJ Open's open peer review process please email [editorial.bmjopen@bmj.com](mailto:editorial.bmjopen@bmj.com)

# BMJ Open

## Feasibility of 2-D ultrasound shear wave elastography of fetal lungs in case of threatened preterm labor: a protocol study

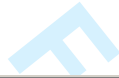

|                                 |                                                                                                                                                                                                                                                                                                                                                                                                                                                                                                                                                                                                                                                                                                                                                                                                                                                                                                                                                                                                                                                                                                                                                                    |
|---------------------------------|--------------------------------------------------------------------------------------------------------------------------------------------------------------------------------------------------------------------------------------------------------------------------------------------------------------------------------------------------------------------------------------------------------------------------------------------------------------------------------------------------------------------------------------------------------------------------------------------------------------------------------------------------------------------------------------------------------------------------------------------------------------------------------------------------------------------------------------------------------------------------------------------------------------------------------------------------------------------------------------------------------------------------------------------------------------------------------------------------------------------------------------------------------------------|
| Journal:                        | <i>BMJ Open</i>                                                                                                                                                                                                                                                                                                                                                                                                                                                                                                                                                                                                                                                                                                                                                                                                                                                                                                                                                                                                                                                                                                                                                    |
| Manuscript ID                   | bmjopen-2017-018130                                                                                                                                                                                                                                                                                                                                                                                                                                                                                                                                                                                                                                                                                                                                                                                                                                                                                                                                                                                                                                                                                                                                                |
| Article Type:                   | Protocol                                                                                                                                                                                                                                                                                                                                                                                                                                                                                                                                                                                                                                                                                                                                                                                                                                                                                                                                                                                                                                                                                                                                                           |
| Date Submitted by the Author:   | 08-Jun-2017                                                                                                                                                                                                                                                                                                                                                                                                                                                                                                                                                                                                                                                                                                                                                                                                                                                                                                                                                                                                                                                                                                                                                        |
| Complete List of Authors:       | <p>MOTTET, Nicolas; University Hospital of Besançon, Department of Obstetrics and Gynecology ; Nanomedecine Laboratory, INSERM EA4662, University of Franche-Comte</p> <p>Aubry, Sébastien ; University Hospital of Besançon, Department of Radiology; University of Franche-Comte, Nanomedecine laboratory, INSERM EA4662</p> <p>Vidal, Chrystelle; University Hospital of Besançon, Centre d'investigation Clinique-Innovation Technologique 1431, INSERM</p> <p>Boiteux, Guillaume; University Hospital of Besançon, Centre d'investigation Clinique-Innovation Technologique 1431, INSERM</p> <p>Metz, Jean-Patrick; University Hospital of Besançon, Department of Obstetrics and Gynecology</p> <p>Riethmuller, Didier ; University Hospital of Besançon, Department of Obstetrics and Gynecology</p> <p>Pazart, Lionel; University Hospital of Besançon, Inserm Centre Investigation Clinique-Innovation Technologique 1431, INSERM; Inserm, CIC1431</p> <p>Ramanah, Rajeev; University Hospital of Besançon; University of Franche-Comte, Department of Obstetrics and Gynecology; Nanomedecine Laboratory, INSERM EA4662, University of Franche-Comte</p> |
| <b>Primary Subject Heading</b>: | Radiology and imaging                                                                                                                                                                                                                                                                                                                                                                                                                                                                                                                                                                                                                                                                                                                                                                                                                                                                                                                                                                                                                                                                                                                                              |
| Secondary Subject Heading:      | Obstetrics and gynaecology, Paediatrics                                                                                                                                                                                                                                                                                                                                                                                                                                                                                                                                                                                                                                                                                                                                                                                                                                                                                                                                                                                                                                                                                                                            |
| Keywords:                       | Ultrasonography < OBSTETRICS, Prenatal diagnosis < OBSTETRICS, Fetal medicine < OBSTETRICS, shear wave elastography, lung                                                                                                                                                                                                                                                                                                                                                                                                                                                                                                                                                                                                                                                                                                                                                                                                                                                                                                                                                                                                                                          |
|                                 |                                                                                                                                                                                                                                                                                                                                                                                                                                                                                                                                                                                                                                                                                                                                                                                                                                                                                                                                                                                                                                                                                                                                                                    |

SCHOLARONE™  
Manuscripts

1  
2  
3 **Feasibility of 2-D ultrasound shear wave elastography of fetal lungs in case of**  
4 **threatened preterm labor: a protocol study**  
5  
6  
7

8 Nicolas Mottet <sup>1,2</sup>, Sébastien Aubry <sup>2,3</sup>, Chrystelle Vidal <sup>4</sup>, Guillaume Boiteux <sup>4</sup>, Jean-Patrick  
9 Metz <sup>1</sup>, Didier Riethmuller <sup>1</sup>, Lionel Pazart <sup>4</sup>, Rajeev Ramanah <sup>1,2</sup>  
10

11  
12 <sup>1</sup> Pôle Mère-Femme, department of Obstetrics and Gynecology, University Hospital of  
13 Besançon; University of Franche-Comte, 25000 Besançon, France  
14

15 <sup>2</sup> Nanomedecine Laboratory, INSERM EA4662, University of Franche-Comte, 25000,  
16 Besançon, France.  
17

18 <sup>3</sup> Department of Musculoskeletal Imaging, University Hospital of Besançon, 25000 Besançon,  
19 France  
20

21 <sup>4</sup> Centre d'investigation Clinique-Innovation Technologique 1431, INSERM, University  
22 Hospital of Besançon, France.  
23  
24

25  
26  
27 Correspondence to:

28  
29 Nicolas MOTTET

30  
31 University Hospital of Besançon, Department of Obstetrics and Gynecology

32  
33 Alexander Fleming Boulevard

34  
35 25000 Besançon, France  
36

37  
38 Telephone number +33 381 21 88 95

39  
40 Fax number +33 381 21 86 13

41  
42 Email: [nemottet@gmail.com](mailto:nemottet@gmail.com)  
43  
44  
45  
46  
47  
48  
49  
50  
51  
52  
53  
54  
55  
56  
57  
58  
59  
60

1  
2  
3 **Contributors** : All the authors contributed to the conception and design of the study. NM,  
4 SA, and RR provided the idea for the research or article, created the hypothesis and wrote the  
5 original proposal. NM, CV, LP and RR significantly contributed to writing the paper. NM,  
6 CV, GB and LP wrote this protocol paper. All authors read and approved the final manuscript.  
7  
8  
9

10 **Funding:** This study is supported by University Hospital of Besançon, APICHU Réf:  
11 API/2015/60  
12

13  
14 **Competing interests** None declared.  
15

16  
17 Patient consent obtained.  
18  
19

20 **Ethics approval** The Human Research Ethics Committee (Comité de Protection des  
21 Personnes EST II, process number **15/494**)  
22  
23  
24  
25  
26  
27  
28  
29  
30  
31  
32  
33  
34  
35  
36  
37  
38  
39  
40  
41  
42  
43  
44  
45  
46  
47  
48  
49  
50  
51  
52  
53  
54  
55  
56  
57  
58  
59  
60

## ABSTRACT

### Introduction

2-D ultrasound Shear Wave Elastography (SWE) could be considered as a new noninvasive tool for monitoring fetal lung development based on evaluation of mechanical properties during pregnancy. Interesting results are available concerning use of SWE on developing organs, especially on premature infants and animals models. The main objective in this study is to evaluate feasibility of 2-D SWE in human fetal lungs between 24 and 34 weeks of gestation (WG) and to modelize fetal lung-to-liver elastography ratio (LLE ratio). Secondary objective is to assess LLE ratio's variations between normal lung and lung surfactant-enriched after a corticosteroids course indicated for a threatened preterm labor (TPL).

### Methods and analysis

A prospective case-control study will be performed between 24 and 34 weeks of gestation (WG), after the fetal period of organogenesis. Fetal lungs and liver will be explored by SWE into two groups: fetuses of women with an uncomplicated pregnancy will be considered as control group and fetuses of women with a TPL requiring administration of corticosteroids will be enrolled as cases. Corticosteroids generate an effect model interesting for assessment of LLE ratio variation in the cases. Primary judgment criterion is the value of Elasticity modulus (E).

We shall not attempt to define reference value of fetal lung elasticity or to correlate SWE value with respiratory function at birth. This protocol is designed for demonstrating applicability of the technique in fetal lungs and liver.

### Ethics and dissemination

The study respects the ethical standards established in the declaration of Helsinki. Approval of the study protocol was obtained from the human ethical research committee (Comité de Protection des Personnes EST II, process number 15/494) and the French National Agency for Medicines and Health Products Safety (process number 2015-A01575-44). All participants will sign a statement of informed consent.

**Trial Registration number:** NCT02870608

**Key words:** Shear wave elastography, stiffness, ultrasound, lung, prenatal

### Strengths and limitation of the study

- The study is designed to evaluate feasibility of 2-D ultrasound Shear Wave Elastography in human fetal lungs between 24 and 34 WG and to modelize fetal lung-to-liver elastography ratio (LLE ratio).
- This study will be the first one to demonstrate applicability of Shear Wave Elastography in human fetal lungs.
- Different factors will be taken into account to understand variability of measures: acquisition depth, number of measurements and representative values such as median or mean values.
- We shall not attempt to define reference value of fetal lung elasticity or to correlate SWE value with respiratory function at birth.

## INTRODUCTION:

### Background

Prenatal evaluation of fetal lung maturity (FLM) is still a challenge and different approaches have been reported with invasive biological tools or fetal imaging including ultrasounds and magnetic resonance imaging (MRI). FLM is mainly correlated with surfactant level and numerous tests have been developed to quantify this production: lecithin/sphingomyelin ratio (L/S), laminar body count, testing for Phosphatidyl glycerol with thin-layer chromatography, and estimation of the surfactant/albumin ratio using polarized light. All of these tests have been shown to have good sensitivity and negative predictive values; however, they all have a low positive predictive value and need invasive procedure<sup>1,2</sup>. Thus, amniocentesis for FLM became obsolete<sup>3</sup>.

Lung and liver signal or echogenicity were often compared as ratio to assess FLM in several studies<sup>4-10</sup>. Non-invasive assessment of FLM has been first attempted using ultrasonography quantified by gray level histogram<sup>4,11,12</sup>. These studies demonstrated sonographic changes associated with lung maturation but weak correlations between echogenicity and respiratory distress syndrome (RDS). Quantitative analysis with specific software has been secondly proposed to improve robustness. Fetal lung texture analysis with this method demonstrated a strong correlation with gestational age, biological test on amniotic fluid and risk of neonatal respiratory morbidity<sup>13, 14</sup>. Additionally, several studies found a significant association between fetal lung-to-liver signal intensity ratio and estimated gestational age with fetal Magnetic Resonance Imaging (MRI). Actually, this technique is mainly used to assess fetal lung development and volume, especially in case of congenital diaphragmatic hernia or severe oligohydramnios. Nevertheless, the accuracy of both MRI and ultrasounds for estimating long-term respiratory outcomes remains limited<sup>15-19</sup>. These previous technique propose prenatal evaluation of lung maturity based on imaging features, but prediction of the pulmonary function through prenatal biomechanical properties seems relevant. With this hypothesis, we advanced the concept of “prenatal functional imaging” and shear wave elastography (SWE) could be a promising tool.

SWE is a recent ultrasound technology, which enables to assess the stiffness of tissues in real time<sup>20</sup>. In locally homogeneous and purely elastic medium, we can calculate Young's modulus (kPa) from the shear wave speed ( $\text{m}\cdot\text{s}^{-1}$ ) by using SWE with the formula:  $E= 3\rho\cdot c_{\text{sw}}^2$  ( $\rho$  being the medium density and  $c_{\text{sw}}$  the shear wave speed). The stiffness at any location of

1  
2  
3 the ROI can be sampled using measurement tools to obtain a quantitative evaluation either in  
4 terms of shear wave speed or Young's modulus. A low shear wave speed corresponds to a  
5 soft tissue, while a shear wave high speed indicates a stiff tissue. Study of deep organs is  
6 possible with SWE because this method does not require any compression- relaxation  
7 sequence on the target organ. One of the advantages of SWE over other elastography methods  
8 is that the generation of the mechanical impulse is operator-independent. SWE is expanding  
9 its range nowadays by its promising role for examination of various organs (liver, thyroid)  
10 and for aiding discrimination of lesion characteristic, especially breast or prostate tumors<sup>21-24</sup>.

11  
12  
13  
14  
15  
16 There is to date no publication regarding its use on human fetuses. The Food and Drug  
17 Administration (FDA) has so far, not yet approved use of SWE for obstetric clinical  
18 applications because of the paucity of data in the literature. Although there is no report about  
19 apparent histological changes with shear wave, the absence of others bioeffects could not be  
20 discarded and further studies are recommended<sup>25-27</sup>. However, setting parameters respect  
21 mechanical and thermal indexes for soft-tissues and bone, which are necessary to allow an  
22 obstetric examination defined by the FDA<sup>28,29</sup>.

23  
24  
25  
26  
27  
28 Interesting and reassuring results are available concerning use of SWE on developing  
29 organs, especially on premature infants and animals models. Principals organs explored are  
30 the liver, brain and lungs. Quarello et al demonstrated the possibility to use SWE in non-  
31 human primate fetuses and its feasibility to explore fetal organs. They found that elasticity  
32 values were related to organs and gestational age<sup>30</sup>. Concerning fetal lungs elasticity,  
33 measurements of the proximal lungs seem to increase throughout the pregnancy. Concerning  
34 use of SWE on premature infants, results are more numerous and include exploration of the  
35 liver or the brain. Alison et al. have demonstrated feasibility and reproducibility of liver  
36 stiffness in preterm neonates with intra uterine growth restriction (IUGR) and gestational age  
37 at birth between 26-31 weeks of gestation WG<sup>31</sup>. Others studies reported contribution of  
38 SWE to the diagnosis of biliary atresia in neonates<sup>32,33</sup>. Kim et al described variation of brain  
39 elasticity in different regions in healthy neonates born between 28 and 40 WG<sup>34</sup>. Su et al  
40 quantitatively evaluated the effect of acoustic radiation force impulse imaging (ARFI) in  
41 neonatal brain development. The authors found that full-term neonates had significantly  
42 higher elasticity values than preterm neonates and there were no reported immediate adverse  
43 events<sup>35</sup>. Others teams work on application of this technology to neonates as a supplementary  
44 tool to detect early ischemic brain injury<sup>36</sup>.

45  
46  
47  
48 If we describe fetal thorax centered on a 4-chamber view of the fetal heart with SWE,  
49 the following observations can be made (figure 1):  
50  
51  
52  
53  
54  
55



- SWE is able to make distinction between fetal soft and stiff tissues. Fetal ribs appear red colored mapped whereas proximal lung appears blue colored.
- A homogeneous colored area can be obtained on the proximal lung with a color scale ranging from 0 to 48 kPa. A homogeneous ROI is important for the reliability of the results.
- SWE can differ according to the acquisition depth. Proximal lung appears with a blue homogenous distribution whereas distal lung appears with green homogenous distribution.

### Objectives

The main objective of this pilot study is to evaluate feasibility of SWE in human fetal lungs between 24 and 34 WG and to modelize fetal lung-to-liver elastography ratio (LLE ratio) from the most reproducible regions of both target organs, between 24 and 34 WG. Secondary objective is to assess LLE ratio's variations between fetal lungs with different supposed biomechanical properties: normal lungs and lungs surfactant-enriched after a corticosteroids course indicated for a threatened preterm labor.

## METHODS/DESIGN

### Study design and setting

A prospective case-control study will be performed at the University Hospital of Besançon, (Besançon, France), Department of Obstetrics and Gynecology. Fetal lungs and liver will be explored by SWE between 24 and 34 WG in two groups: fetuses of women with an uncomplicated pregnancy will be considered as control group, and fetuses of women with a threatened preterm labor requiring administration of corticosteroids will be enrolled as cases. In this pilot study, corticosteroids generate an effect model interesting for assessment of LLE ratio variation in the cases. We take advantage of the action of corticosteroids to explore another medium with different supposed biomechanical properties. Indeed, corticosteroids accelerated development of type 2 pneumocytes leading to surfactant production. Similarly, there is a significant increase in saturated phosphatidylcholine content in fetal lung, modifying propagation of shear waves potentially<sup>37</sup>.

Control group will be recruited during routine prenatal visits or ultrasounds according to the French ultrasounds schedule (ultrasound screening during the second trimester between 20-25 WG and the third trimester between 30-35 WG<sup>38</sup>). Cases will be enrolled during their hospitalization for threatened preterm delivery (figure 2). The design, conduction and reporting of this study will follow the norms of the Strengthening the Reporting of Observational Studies in Epidemiology (STROBE) statement<sup>39</sup>.

### Ethical considerations

The study respects the ethical standards established in the declaration of Helsinki<sup>40</sup>. Investigators undertake to respect law no. 2004-806 of August 9,2004 relative to public health policy on clinical trials, made effective by implementing Decree 2006-477 of April 26,2006<sup>41</sup>. Approval of the study protocol was obtained from the human ethical research committee (Comité de Protection des Personnes EST II, process number **15/494**) and the French National Agency for Medicines and Health Products Safety (process number **2015-A01575-44**). The study is registered on clinical trial.gov with the following number: **NCT02870608**. All participants will sign a statement of informed consent and will be allowed to abandon the study at any time, with no negative consequences. All procedures of the study will be confidential. The study will involve collection and storage of ultrasound images and

1  
2  
3 study participants will therefore be thoroughly informed. All variables (patient parameters,  
4 data items, data elements) will be aggregated into electronic Case report Forms.  
5

6 As explained in the background, The Food and Drug Administration (FDA) has so far,  
7 not yet approved use of SWE for obstetric clinical applications because of the paucity of data  
8 in the literature. In this study, fetuses will be included from 24 to 34 WG, over the period of  
9 organogenesis. In the patient information sheet, it is specified that previous studies explored  
10 liver or brain of premature infants with SWE. Alison et al. studied liver stiffness in preterm  
11 neonates with intra uterine growth restriction (IUGR) and gestational age at birth between 26-  
12 31 WG<sup>31</sup>. Franchi-Abella et al evaluate feasibility and diagnostic accuracy of SWE for the  
13 assessment of liver stiffness in 96 patients and 7 were preterm newborns between 30-35 WG  
14<sup>42</sup>. Both studies did not report adverse outcomes and were approved by institutional review  
15 board. Moreover, consent form mentions conclusions of an experimental study of the  
16 biological effects associated with SWE in brains of neonatal mice. Results indicated that  
17 using SWE doe not cause detectable histologic changes. Potential effects on intracellular  
18 signaling pathways were detected when the SWE scanning lasted more than 30 min<sup>25</sup>. Thus,  
19 patients will be informed that our study is focused on fetuses with a gestational age similar to  
20 preterm newborn included in the above-mentioned studies. Moreover, exploration with SWE  
21 will concern only lung and liver with duration of less than 10 min.  
22  
23  
24  
25  
26  
27  
28  
29  
30  
31  
32  
33

### 34 **Participants**

35  
36  
37 Cases will be recruited during hospitalization for a threatened preterm labor requiring  
38 administration of corticosteroids. The complementary inclusion criteria are: pregnant women  
39 aged 18 years or more, singleton pregnancy with eutrophic fetus, signature of consent and  
40 affiliation to health insurance scheme (figure 2). Patients will be stratified by gestational age  
41 between 24 and 34 WG, with one class every WG (10 classes in total) and 5 patients per class.  
42 After obtaining consent, a SWE exam will be performed before the first intramuscular  
43 administration of corticosteroids “day 0” (betamethasone 12mg). A second SWE exam will be  
44 performed within 24 h after the second intramuscular administration of corticosteroids “day  
45 2”. A third SWE will be performed between the fifth and the seventh day following the first  
46 administration of corticosteroids “day 5-7”, if the women are not early discharge at home.  
47  
48  
49  
50  
51  
52  
53

54 For the control group, women will be matched by gestational age and will be recruited  
55 during their pregnancy monitoring. Information concerning the study will be given as early as  
56 the second trimester by obstetrician or midwives during medical visits or ultrasounds. The  
57  
58  
59  
60

1  
2  
3 complementary inclusion criteria are following: major pregnant women, uncomplicated  
4 pregnancy between 24 and 34 WG, singleton pregnancy with eutrophic fetus, signature of  
5 consent and affiliation to health insurance scheme (figure 2). If they are willing to participate,  
6 a first SWE exam will be proposed at “day 0”, followed by a second one in two days “day 2”.  
7 Patients who come back for an SWE exam performed outside current medical visit will  
8 receive financial compensation for travel expenses. As well as cases, control patients will be  
9 stratified by gestational age between 24 and 34 WG.  
10  
11  
12  
13

14 Exclusion criteria common to both groups are: Fetal lung or liver pathologies,  
15 inclusion in another medical study, patients under legal incapacity.  
16  
17  
18  
19

## 20 **Variables and measuring technique**

- 21 • **Prenatal variables**

22  
23  
24 Primary judgment criterion is the value of elasticity modulus (E) (Young’s modulus)  
25 expressed in kilopascal (kPa). A Logic E9 system (General Electric Medical System,  
26 Milwaukee, WI, USA) with CE certification CE LNE/G-MED [CE0459] will be used for this  
27 study, equipped with abdominal convex probe 1-6 MHz (C1-6-D probe). To provide robust  
28 shear wave and optimize its detection, Logiq E9 uses innovative techniques. Comb-push  
29 Ultrasound SWE generates multiple shear wave sources into the region of interest (ROI) and  
30 uses directional filtering to remove the interference. The TAST technique is able to robustly  
31 track shear waves and correct for the sequential tracking delay<sup>43</sup>. This technique has the merit  
32 of rapid and solid reconstruction of a large elasticity map with the only single acquisition by  
33 generating multiple shear waves from multiple unfocused push beams.  
34  
35  
36  
37  
38  
39  
40  
41

42 The shear wave acquisition measurement protocol is saved in a specific preset that will  
43 be used for every patient: Mode 2D: Harmonic imaging central depth = 6 cm, frequency = 6  
44 MHz, Acoustic Power 100%; Mode elastography: Shear wave signal frequency ranges from  
45 50 to 400 kHz, Acoustic power of the pushing beam: 100%, Tracking power: 100%, color  
46 scale ranging from 0 to 48 kPa. Each measurement has to be performed on a homogeneous  
47 area to be valid. Operators will perform 2 cycles of 3 elasticity measurements while  
48 systematically repositioning the probe on each target organ. A cycle includes: 3  
49 measurements on the proximal lung (anterior “P1”, medium “P2” and posterior portion “P3”),  
50 3 measurements on the distal lung (anterior “D1”, medium “D2” and posterior portion “D3”)  
51 and 3 measurements on 3 liver segments (IV, V, VI) (figure 3). Implementation of Shear  
52  
53  
54  
55  
56  
57  
58  
59  
60

1  
2  
3 Wave elastography displays 2D images of Young's Modulus in the target organ. In real time,  
4 the elasticity appears color coded, where blue identifies deformable tissue and red indicates  
5 rigid tissues. The stiffness at any location will be sampled using a round ROI of 5 mm.  
6 Distance between the probe and the target organ will be collected. The average stiffness in the  
7 ROI will be automatically recorded by the system in a worksheet. The investigators will  
8 adjust the position of the ROI using the B-mode image for guidance and take care to obtain  
9 the most homogeneous color coded ROI before stiffness estimation (figure 4). Technical  
10 failure was defined as failure to obtain a homogeneous color map in more than 50% in the  
11 sampling area. To test the inter-observer variability, a second observer will successively  
12 perform measurements on 30 fetuses. All measurements will be carried out directly by  
13 ultrasound on the target organ and the second operator will be blinded to the feasibility and  
14 results obtained by the first one.  
15  
16  
17  
18  
19  
20  
21  
22  
23

24 Evaluation of fetal weight will be performed during each exam according to Hadlock  
25 formula based on Cephalic circumference (CC), Abdominal circumference (AC) and femoral  
26 length (FL):  $\log_{10} \text{EPF} = 1,326 + 0,0107 \text{ PC} + 0,0438 \text{ PA} + 0,158 \text{ LF} + 0,00326 (\text{PA} \times \text{LF})$   
27  
28

29 44.

30  
31 • **Postnatal variables**  
32  
33

34  
35 The following pharmacovigilance data will be collected at birth and 3 months later in  
36 order to assess safety of the device:  
37

- 38 - At birth in both groups: term of birth, weight, neonatal transfer, Apgar Score and  
39 evaluation of respiratory distress by Silverman Score <sup>45</sup>.  
40  
41 - Three months after birth: medical history, health problems, respiratory diseases or  
42 symptoms, liver disease or symptoms and number of hospitalization since birth.  
43  
44  
45

46  
47 **Limitation of Bias**

48 Use of sampling method with 5 patients per class of gestational age will limit  
49 repartition bias between control and cases. Inclusion of any pregnant women attending  
50 Besançon University maternity for the control group, and inclusion of all women with a  
51 threatened preterm labor will limit risk of selection bias. Risk of loss will be limited in the  
52 cases group between "day 0" and "day 2" because patients will remain hospitalized for  
53 corticosteroids administration. Nevertheless, risk of loss is most important between "day 2"  
54  
55  
56  
57  
58  
59  
60

1  
2  
3 and “day 5-7” because of possible early discharge at home after the second administration of  
4 corticosteroids. For ethical and medical reasons, cases early discharge at home cannot be  
5 convened in “day 5-7”. Risk of loss will be limited in the control group because of a financial  
6 compensation for travel expenses. To limit inter-observer variation, expert sonographers will  
7 perform elastography exams.  
8  
9  
10

### 11 12 13 **Study size**

14  
15 Because of the paucity of data regarding SWE on human fetal lung, the sample size  
16 calculation was based on measurements of fetal lungs in pregnant baboons and extrapolations  
17 made by clinicians, with the following assumptions: average expected value of elasticity  
18 coefficient for fetal lung will be 2 KPa at 24 WG and 4 KPa at 34 WG. We hypothesized a  
19 linear increase of elasticity coefficient during pregnancy in the control group and a decrease  
20 in cases exposed to corticosteroids. At “day 2”, we therefore expect in the cases a variation of  
21 0.2 KPa (corresponding to one week of lung maturation during gestation). Forty-two patients  
22 per group will be needed to have 90% power to statistically demonstrate such a difference  
23 (0.2 versus 0.057) assuming an  $\alpha$  risk of 0.05 and standard deviation of 0.2.  
24  
25  
26  
27  
28  
29  
30  
31  
32

### 33 **Proposed statistical analysis**

- 34  
35  
36 • **Technical validation:**

37  
38  
39 Feasibility will be evaluated by assessing the number of exams performed and the number  
40 of exams with interpretable results. Different limiting factors that can affect the results will be  
41 evaluated, especially reduced amniotic fluid, fetal position and maternal body mass index.  
42 Intra and inter-observer reproducibility will be evaluated by means of the intra-class  
43 correlation coefficient (ICC). Further, each sets of measurements for evaluation of inter- and  
44 intra-observer variability will be compared by calculating the following parameters as  
45 described by Bland and Altman and graphically presented as Bland-Altman scatter plots (46).  
46 Only repeatable and reproducible values of each ROI will be considered to modelize LLE  
47 ratio.  
48  
49  
50  
51  
52  
53

- 54  
55 • **Clinical evaluation**

1  
2  
3 Evolution of fetal lung SWE, fetal liver SWE and lung-to-liver-SWE ratio will be  
4 assessed by group and overall. Lung-to-liver-SWE Ratio will be initially defined as the value  
5 of the lung elasticity divided by the value of the liver elasticity.  
6  
7

8 SWE values before corticosteroids administration will be compared between cases and  
9 control groups. If there is a statistically significant difference, a confusional bias will have to  
10 be sought between fetal lung elasticity values and threatened preterm labor. All results will be  
11 presented as “delta” variation between two measurements in order to limit “non-comparability  
12 bias” between both groups. If corticosteroids affect fetal lung elasticity, “delta before/after”  
13 will be more important in cases than controls.  
14  
15  
16  
17

18 Analysis of mean differences between groups will be carried out using a Student’s test or  
19 Wilcoxon test according to distribution of data for quantitative variables. Shapiro-Wilk test  
20 will be used to determine if data set is well modeled by a normal distribution. The relationship  
21 of quantitative variables to each other will be tested using Pearson’s or Spearman’s  
22 correlation as appropriate.  
23  
24  
25

26 Qualitative variable will be expressed as frequencies and quantitative variables will be  
27 displayed as the mean  $\pm$  SD if normally distributed or as the median  $\pm$  IQR (Inter Quartile  
28 Range) if asymmetrically distributed. Qualitative variables will be analyzed using a  $\chi^2$  test or  
29 Fisher test.  
30  
31  
32

33 For statistical analyses, the level of statistical significance will be set at 5% ( $p < 0.05$ ).  
34 Statistical analysis will be performed with statistical software SAS for Windows, version 9.4  
35 and MedCalc software, version 15.  
36  
37  
38  
39  
40  
41  
42  
43  
44  
45  
46  
47  
48  
49  
50  
51  
52  
53  
54  
55  
56  
57  
58  
59  
60



## DISCUSSION

SWE could be considered as a new noninvasive tool for monitoring fetal lung development based on evaluation of mechanical properties during pregnancy. However, standardization for measuring SWE in human fetal lung is necessary to demonstrate applicability of the technique, and to understand limiting factors. This pilot study will focus on technical performances before considering clinical applications. In this protocol, SWE will be used after fetal period of organogenesis and pharmacovigilance data will be collected at birth and 3 months later in order to assess safety of the device.

With the study design, we shall not attempt to define reference value of fetal lung elasticity during pregnancy or to correlate SWE value with respiratory function at birth. The main objective is to evaluate feasibility and reproducibility of SWE in human fetal lung between 24 and 34 WG and to modelize a new LLE ratio. Indeed, each target organ will be explored through three measurements to define the most relevant and reproducible regions with the lowest intra and inter-observer variability. Use of LLE ratio is interesting because it allows comparison between two tissues in which the liver is taken as a reference organ. Several studies indicate that liver signal or echogenicity remain constant through gestation suggestive of a regular evolution of the tissue characteristics<sup>47,48</sup>. Thus, we will compare evolution of SWE values between two organs subjected to the same technical variations, especially for depth. Both lung and liver tissue density increase during pregnancy and we expect a linear increase of SWE values of these organs. In case of variations of lung SWE values after a course of corticosteroids, LLE ratio should be modified. If we suppose that liver elasticity will be constant between two separate exams of 48h, LLE ratio will decrease if corticosteroids lead to attenuation of shear wave speed. Conversely, if lung elasticity increases after a course of corticosteroids, LLE ratio will also increase.

One advantage of this protocol is to evaluate SWE in three tissues with different supposed biomechanical properties: normal lung, lung with increase of surfactant synthesis after corticosteroids course, and liver. Corticosteroids generate an effect model interesting for assessment of LLE's ratio variation in the cases because of a significant increase of phosphatidylcholine content in fetal lungs. This effect is mediated by an activation of choline-phosphate cytidyltransferase<sup>37</sup>. Given the placental transfer and time to induce cellular mechanism of transcription, an artificial delay of 24h seems to be necessary to produce surfactant in pneumocytes type 2. The benefit of corticosteroid administration is greatest at 2–



1  
2  
3 7 days after the initial dose <sup>49,50</sup>. Two approaches can be proposed after a complete course of  
4 corticosteroids. On the one hand, SWE of fetal lung could increase because corticosteroids  
5 accelerate FLM, and we could expect an advanced ripening by one WG. On the other hand,  
6 increase in phospholipids content in fetal lung after corticosteroids could increase viscosity  
7 and lead to dispersion of shear wave speed and attenuation.  
8  
9  
10

11  
12 Different factors will be taken into account in this study to understand variability of  
13 measures: acquisition depth, number of measurements and representative values such as  
14 median or mean values. Shear wave velocity can be different according to the acquisition  
15 depth and this parameter is gradually underestimated with increasing depth. Effect is greatest  
16 in stiff tissues but little effect is seen in soft target <sup>51-53</sup>. This phenomenon might be explained  
17 by a damping of the acoustic push pulse that generates the shear waves by both increased  
18 attenuation and increased stiffness of the target <sup>54</sup>. Thus, we expected low variation between  
19 proximal and distal lung because they may be considered as soft tissues. There are also  
20 debates about the acquisition number during SWE and the designers of the device did not  
21 provided advices. The number of measurements (NMs) reported in the recent literature on  
22 various organs is inconsistent (commonly seen are 3, 4 and 5 NMs) <sup>55-56</sup>. Quarello et al  
23 reported 3 NMs on fetal lungs in pregnant baboons and ICC for and inter observer variability  
24 were better for an average value of three measurements <sup>57</sup>. For Alison et al, 9 NMs were  
25 performed on liver in preterm neonates with intra uterine growth restriction (3 measurements  
26 from three different liver segments). Measurements showed high reproducibility on average  
27 values (ICC = 0.94–0.98 for intra-operator, 0.86 for inter-operator) <sup>31</sup>. One objective of our  
28 protocol is to determine the NM's necessary to evaluate fetal lung SWE with a good inter and  
29 intra-observer reproducibility. Thus, each value will be analyzed to determine if mean lung  
30 and liver SWE can be achieved through only 1 valid measurement or more, and if its  
31 performance is equivalent to 2 or 3 valid measurements.  
32  
33  
34  
35  
36  
37  
38  
39  
40  
41  
42  
43  
44  
45

46 To sum up, we hope that the results of this study will contribute to clarify applicability  
47 of SWE on human fetal lung between 24 and 34WG. SWE could be a new tool for reliable  
48 prediction of lung development through biomechanical properties. This study will be the first  
49 one to propose a protocol of measurement underlying limiting factors.  
50  
51  
52  
53  
54  
55  
56  
57  
58  
59  
60

## REFERENCES

1. Bhagwanani SG, Fahmy D, Turnbull AC. Prediction of neonatal respiratory distress by estimation of amniotic-fluid lecithin. *Lancet*. 1972;1(7743):159-62.
2. Field NT, Gilbert WM. Current status of amniotic fluid tests of fetal maturity. *Clin Obstet Gynecol*. 1997;40(2):366-86.
3. Varner S, Sherman C, Lewis D et al. Amniocentesis for Fetal Lung Maturity: Will It Become Obsolete? *Rev Obstet Gynecol*. 2013;6(3-4):126-34.
4. Maeda K, Utsu M, Yamamoto N, Serizawa M. Echogenicity of fetal lung and liver quantified by the grey-level histogram width. *Ultrasound Med Biol*. 1999;25(2):201-8.
5. Duncan KR, Gowland PA, Moore RJ et al. Assessment of fetal lung growth in utero with echo-planar MR imaging. *Radiology*. 1999;210(1):197-200.
6. Moshiri M, Mannelli L, Richardson ML et al. Fetal lung maturity assessment with MRI fetal lung-to-liver signal-intensity ratio. *AJR Am J Roentgenol*. 2013;201(6):1386-90.
7. Oka Y, Rahman M, Sasakura C et al. Prenatal diagnosis of fetal respiratory function: evaluation of fetal lung maturity using lung-to-liver signal intensity ratio at magnetic resonance imaging. *Prenat Diagn*. 2014;34(13):1289-94.
8. Gorincour G, Bach-Segura P, Ferry-Juquin M et al. Lung signal on fetal MRI: normal values and usefulness for congenital diaphragmatic hernia. *J Radiol*. 2009;90(1 Pt 1):53-8.
9. Beck APA, Araujo Júnior E, Leslie ATFS et al. Assessment of fetal lung maturity by ultrasound: objective study using gray-scale histogram. *J Matern-Fetal Neonatal Med*. 2015;28(6):617-22.
10. Fried AM, Loh FK, Umer MA, et al. Echogenicity of fetal lung: relation to fetal age and maturity. *AJR Am J Roentgenol*. 1985;145(3):591-4.
11. Serizawa M, Maeda K. Noninvasive fetal lung maturity prediction based on ultrasonic gray level histogram width. *Ultrasound Med Biol*. 2010;36(12):1998-2003.
12. Prakash KNB, Ramakrishnan AG, Suresh S, Chow TWP. Fetal lung maturity analysis using ultrasound image features. *IEEE*. 2002;6(1):38-45.
13. Palacio M, Cobo T, Martínez-Terrón M et al. Performance of an automatic quantitative ultrasound analysis of the fetal lung to predict fetal lung maturity. *Am J Obstet Gynecol*. 2012;207(6):504.e1-504.e5.
14. Cobo T, Bonet-Carne E, Martínez-Terrón M et al. Feasibility and reproducibility of fetal lung texture analysis by Automatic Quantitative Ultrasound Analysis and correlation with gestational age. *Fetal Diagn Ther*. 2012;31(4):230-6.
15. Cannie M, Jani J, Meersschaert J, et al. Prenatal prediction of survival in isolated diaphragmatic hernia using observed to expected total fetal lung volume determined by magnetic resonance imaging based on either gestational age or fetal body volume.

- 1  
2  
3 *Ultrasound Obstet Gynecol.* 2008;32(5):633-9.
- 4  
5 16. Kastenholz KE, Weis M, Hagelstein C, et al. Correlation of Observed-to-Expected MRI  
6 Fetal Lung Volume and Ultrasound Lung-to-Head Ratio at Different Gestational Times  
7 in Fetuses With Congenital Diaphragmatic Hernia. *AJR Am J Roentgenol.*  
8 2016;206(4):856-66.
- 9  
10 17. Kehl S, Becker L, Eckert S et al. Prediction of mortality and the need for neonatal  
11 extracorporeal membrane oxygenation therapy by 3-dimensional sonography and  
12 magnetic resonance imaging in fetuses with congenital diaphragmatic hernias. *J*  
13 *Ultrasound Med.* 2013;32(6):981-8.
- 14  
15 18. Strizek B, Cos Sanchez T, Khalifé J, et al. Impact of operator experience on the  
16 variability of fetal lung volume estimation by 3D-ultrasound (VOCAL) and magnetic  
17 resonance imaging in fetuses with congenital diaphragmatic hernia. *J Matern-Fetal*  
18 *Neonatal Med.* 2015;28(7):858-64.
- 19  
20 19. Rubesova E. Why do we need more data on MR volumetric measurements of the fetal  
21 lung? *Pediatr Radiol.* 2016;46(2):167-71.
- 22  
23 20. Bercoff J, Pernot M, Tanter M, et al. Monitoring thermally-induced lesions with  
24 supersonic shear imaging. *Ultrasound Imaging.* 2004;26(2):71-84.
- 25  
26 21. Erkan M, Canberk S, Kilicoglu GZ, et al. Avoidance of unnecessary fine-needle  
27 aspiration with the use of the Thyroid Imaging Reporting Data System classification  
28 and strain elastography based on The Bethesda System for Reporting Thyroid  
29 Cytopathology. *Mol Clin Oncol.* 2016;5(5):625-30.
- 30  
31 22. Rouvière O, Melodelima C, Hoang Dinh A, et al. Stiffness of benign and malignant  
32 prostate tissue measured by shear-wave elastography: a preliminary study. *Eur Radiol.*  
33 août 2016; 27(5):1858-1866.
- 34  
35 23. Denis M, Gregory A, Bayat M, et al. Correlating Tumor Stiffness with  
36 Immunohistochemical Subtypes of Breast Cancers: Prognostic Value of Comb-Push  
37 Ultrasound Shear Elastography for Differentiating Luminal Subtypes. *PLoS One.*  
38 2016;11(10):e0165003.
- 39  
40 24. Menten R, Leonard A, Clapuyt P et al. Transient elastography in patients with cystic  
41 fibrosis. *Pediatr Radiol.* 2010;40(7):1231-5.
- 42  
43 25. Li C, Zhang C, Li J, Cao X, Song D. An Experimental Study of the Potential Biological  
44 Effects Associated with 2-D Shear Wave Elastography on the Neonatal Brain.  
45 *Ultrasound Med Biol.* juill 2016;42(7):1551-9.
- 46  
47 26. Massó P, Rus G, Molina F. On the safety of elastography in fetal medicine: A  
48 preliminary study of hypoacusia. *Ultrasound Obstet Gynecol.* 2017; [Epub ahead of  
49 print]
- 50  
51 27. Bly S, Van den Hof MC, Diagnostic Imaging Committee, Society of Obstetricians and  
52 Gynaecologists of Canada. Obstetric ultrasound biological effects and safety. *J Obstet*  
53 *Gynaecol.* 2005;27(6):572-80.
- 54  
55  
56  
57  
58  
59  
60

- 1
  - 2
  - 3
  - 4
  - 5
  - 6
  - 7
  - 8
  - 9
  - 10
  - 11
  - 12
  - 13
  - 14
  - 15
  - 16
  - 17
  - 18
  - 19
  - 20
  - 21
  - 22
  - 23
  - 24
  - 25
  - 26
  - 27
  - 28
  - 29
  - 30
  - 31
  - 32
  - 33
  - 34
  - 35
  - 36
  - 37
  - 38
  - 39
  - 40
  - 41
  - 42
  - 43
  - 44
  - 45
  - 46
  - 47
  - 48
  - 49
  - 50
  - 51
  - 52
  - 53
  - 54
  - 55
  - 56
  - 57
  - 58
  - 59
  - 60
28. Fowlkes JB, Bioeffects Committee of the American Institute of Ultrasound in Medicine. American Institute of Ultrasound in Medicine consensus report on potential bioeffects of diagnostic ultrasound: executive summary. *J Ultrasound Med.* 2008;27(4):503-515.
29. Miller DL. Safety assurance in obstetrical ultrasound. *Semin Ultrasound CT MR.* 2008;29(2):156-64.
30. Quarello E, Lacoste R, Mancini J et al. Feasibility and reproducibility of ShearWave(TM) elastography of fetal baboon organs. *Prenat Diagn.* 2015; 35(11):1112-6.
31. Alison M, Biran V, Tanase A, Bendavid M, et al. Quantitative Shear-Wave Elastography of the Liver in Preterm Neonates with Intra-Uterine Growth Restriction. *PLoS One.* 2015;10(11):e0143220.
32. Hanquinet S, Rougemont A-L, Courvoisier D, et al. Acoustic radiation force impulse (ARFI) elastography for the noninvasive diagnosis of liver fibrosis in children. *Pediatr Radiol.* 2013;43(5):545-51.
33. Hanquinet S, Courvoisier DS, Rougemont A-L et al. Contribution of acoustic radiation force impulse (ARFI) elastography to the ultrasound diagnosis of biliary atresia. *Pediatr Radiol.* 2015;45(10):1489-95.
34. Kim HG, Park MS, Lee J-D, Park SY. Ultrasound Elastography of the Neonatal Brain: Preliminary Study. *J Ultrasound Med.* 17 mars 2017; [Epub ahead of print]
35. Su Y, Ma J, Du L, et al. Application of acoustic radiation force impulse imaging (ARFI) in quantitative evaluation of neonatal brain development. *Clin Exp Obstet Gynecol.* 2015;42(6):797-800.
36. Bailey C, Huisman TAGM, de Jong RM, et al. Contrast-Enhanced Ultrasound and Elastography Imaging of the Neonatal Brain: A Review. *J Neuroimaging.* 2017; [Epub ahead of print]
37. Post M, Barsoumian A, Smith BT. The cellular mechanism of glucocorticoid acceleration of fetal lung maturation. Fibroblast-pneumonocyte factor stimulates choline-phosphate cytidylyltransferase activity. *J Biol Chem.* 1986;261(5):2179-84.
38. Rapport de la Conférence Nationale en Echographie Obstetricale et Fœtale. L'échographie de dépistage prénatal CNEOF . 14 juillet 2016 [Internet]. available at: <http://www.cfef.org/archives/bricabrac/cneof/rapportcneof2016.pdf>
39. Noah N. The STROBE initiative: STrengthening the Reporting of OBServational studies in Epidemiology (STROBE). *Epidemiol Infect.* 2008;136(7):865.
40. World Medical Association. World Medical Association Declaration of Helsinki: ethical principles for medical research involving human subjects. *JAMA.* 2013;310(20):2191-4.
41. Maillols-Perroy A-C, Tillet Y. [The adoption of Jardé law modifies the legal framework of clinical research in France]. *Therapie.* avr 2012;67(2):77-87.
42. Franchi-Abella S, Corno L, Gonzales E, et al. Feasibility and Diagnostic Accuracy of

- 1  
2  
3       Supersonic Shear-Wave Elastography for the Assessment of Liver Stiffness and Liver  
4       Fibrosis in Children: A Pilot Study of 96 Patients. *Radiology*. 2016;278(2):554-62.  
5  
6       43. Song P, Macdonald MC, Behler RH, et al. Two-dimensional Shear Wave Elastography  
7       on Conventional Ultrasound Scanners with Time Aligned Sequential Tracking (TAST)  
8       and Comb-push Ultrasound Shear Elastography (CUSE). *Trans Ultrason Ferroelectr*  
9       *Freq Control*. 2015;62(2):290.  
10  
11       44. Hadlock FP, Harrist RB, Carpenter RJ, et al. Sonographic estimation of fetal weight. The  
12       value of femur length in addition to head and abdomen measurements. *Radiology*.  
13       1984;150(2):535-40.  
14  
15       45. Silverman WA, Andersen DH. A controlled clinical trial of effects of water mist on  
16       obstructive respiratory signs, death rate and necropsy findings among premature infants.  
17       *Pediatrics*. 1956;17(1):1-10.  
18  
19       46. Bland JM, Altman DG. Statistical methods for assessing agreement between two  
20       methods of clinical measurement. *Lancet*. 1986;1(8476):307-10.  
21  
22       47. Dubinsky T, Moshiri M, Waldorf KA, et al. Increased fetal lung T2 signal is not due to  
23       increasing surfactant concentration: an in vitro T2 mapping analysis. *Prenat Diagn*.  
24       2017. 37(3):211-214  
25  
26       48. Mills M, Winter TC, Kennedy AM, et al. Determination of fetal lung maturity using  
27       magnetic resonance imaging signal intensity measurements. *Ultrasound Q*.  
28       2014;30(1):61-7.  
29  
30       49. Mulder EJ, Derks JB, Visser GH. Antenatal corticosteroid therapy and fetal behaviour: a  
31       randomised study of the effects of betamethasone and dexamethasone. *Br J Obstet*  
32       *Gynaecol*.1997;104(11):1239-47.  
33  
34       50. Loehle M, Schwab M, Kadner MS, et al. Dose-response effects of betamethasone on  
35       maturation of the fetal sheep lung. *Am J Obstet Gynecol*. 2010;202(2):186.e1.  
36  
37       51. Shin N-Y, Kim M-J, Lee M-J, et al. Transient elastography and sonography for  
38       prediction of liver fibrosis in infants with biliary atresia. *J Ultrasound Med*.  
39       2014;33(5):853-64.  
40  
41       52. Tang A, Cloutier G, Szeverenyi NM, et al. Ultrasound Elastography and MR  
42       Elastography for Assessing Liver Fibrosis: Part 1, Principles and Techniques. *Am J*  
43       *Roentgenol*. 2015;205(1):22.  
44  
45       53. Carlsen JF, Pedersen MR, Ewertsen C, et al. A comparative study of strain and shear-  
46       wave elastography in an elasticity phantom. *Am J Roentgenol*. 2015;204(3):W236-242.  
47  
48       54. Tozaki M, Saito M, Joo C, et al.. Ultrasonographic tissue quantification of the breast  
49       using acoustic radiation force impulse technology: phantom study and clinical  
50       application. *Jpn J Radiol*. 2011;29(8):598-603.  
51  
52       55. Ling W, Lu Q, Quan J, et al.. Assessment of impact factors on shear wave based liver  
53       stiffness measurement. *Eur J Radiol*. 2013;82(2):335-41.  
54  
55  
56  
57  
58  
59  
60

- 1  
2  
3 56. Grenier N, Gennisson J-L, Cornelis F, et al. Renal ultrasound elastography. *Diagn Interv*  
4 *Imaging*. 2013;94(5):545-50.  
5  
6 57. Quarello E, Lacoste R, Mancini J, et al. ShearWave elastography of fetal lungs in  
7 pregnant baboons. *Diagn Interv Imaging*. 2016;97(6):605-10.  
8  
9  
10  
11  
12  
13  
14  
15  
16  
17  
18  
19  
20  
21  
22  
23  
24  
25  
26  
27  
28  
29  
30  
31  
32  
33  
34  
35  
36  
37  
38  
39  
40  
41  
42  
43  
44  
45  
46  
47  
48  
49  
50  
51  
52  
53  
54  
55  
56  
57  
58  
59  
60

1  
2  
3 **Figure 1:** SWE on fetal thorax centered on a 4-chamber view of the fetal heart.  
4

5 **Figure 2:** Design of the study.  
6  
7

8  
9 **Figure 3:** Measurement sites with SWE: 3 measurements on the proximal lung (anterior “P1”,  
10 medium “P2” and posterior portion “P3”), 3 measurements on the distal lung (anterior “D1”,  
11 medium “D2” and posterior portion “D3”) and 3 measurements on 3 liver segments (IV, V,  
12 VI) according to Couinaud classification.  
13  
14

15  
16  
17 **Figure 4:** SWE on proximal fetal lung. Image (a) is degraded by artifact on the left side of the  
18 ROI due to rib shadowing. By moving the probe and the ROI to another location, a more  
19 homogeneous image (b) is obtained.  
20  
21  
22  
23  
24  
25  
26  
27  
28  
29  
30  
31  
32  
33  
34  
35  
36  
37  
38  
39  
40  
41  
42  
43  
44  
45  
46  
47  
48  
49  
50  
51  
52  
53  
54  
55  
56  
57  
58  
59  
60



1  
2  
3  
4  
5  
6  
7  
8  
9  
10  
11  
12  
13  
14  
15  
16  
17  
18  
19  
20  
21  
22  
23  
24  
25  
26  
27  
28  
29  
30  
31  
32  
33  
34  
35  
36  
37  
38  
39  
40  
41  
42  
43  
44  
45  
46  
47  
48  
49  
50  
51  
52  
53  
54  
55  
56  
57  
58  
59  
60

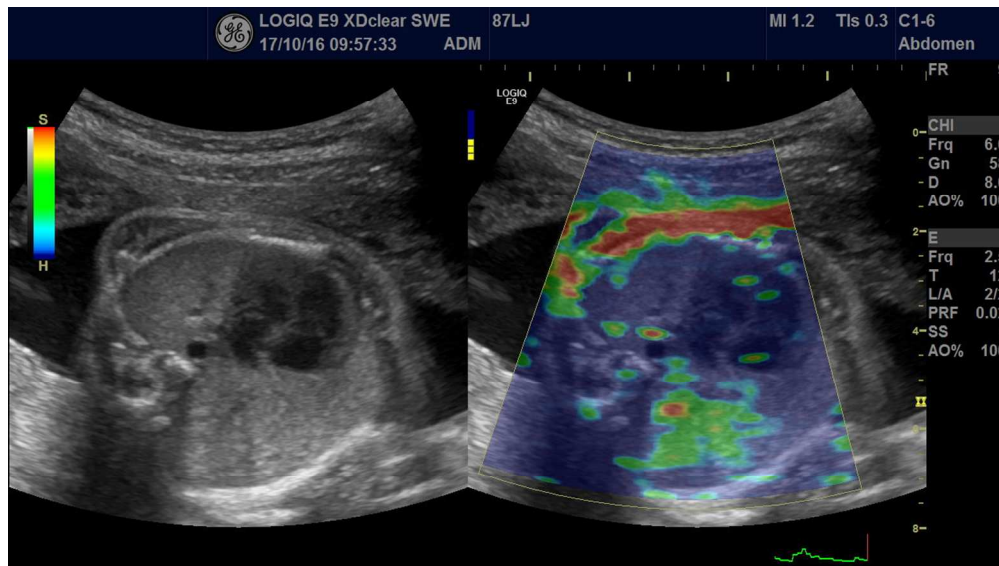

2-D ultrasound SWE on fetal thorax centered on a 4-chamber view of the fetal heart.

108x60mm (300 x 300 DPI)

review only



1  
2  
3  
4  
5  
6  
7  
8  
9  
10  
11  
12  
13  
14  
15  
16  
17  
18  
19  
20  
21  
22  
23  
24  
25  
26  
27  
28  
29  
30  
31  
32  
33  
34  
35  
36  
37  
38  
39  
40  
41  
42  
43  
44  
45  
46  
47  
48  
49  
50  
51  
52  
53  
54  
55  
56  
57  
58  
59  
60

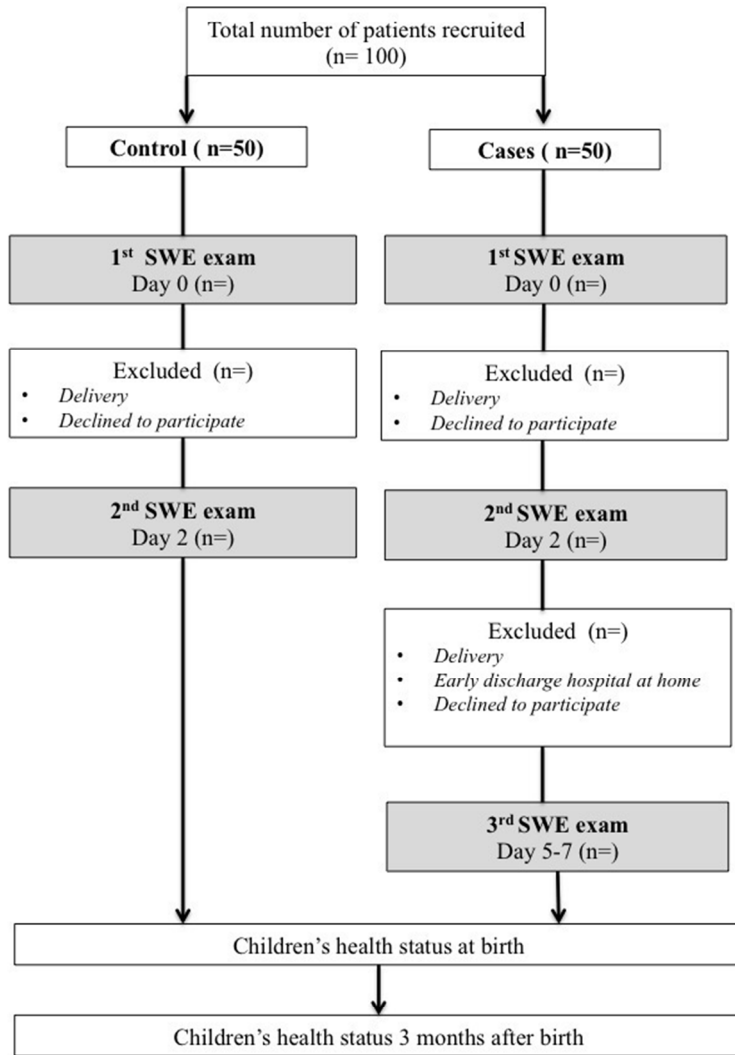

Design of the study.

60x81mm (300 x 300 DPI)

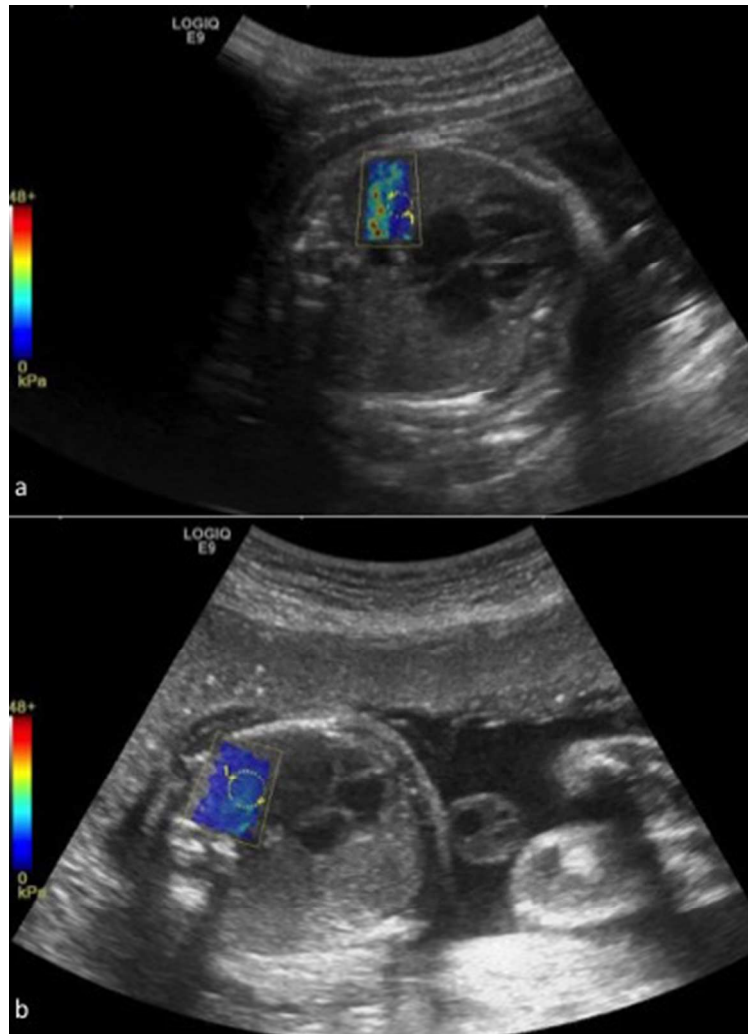

SWE on proximal fetal lung. Image (a) is degraded by artifact on the left side of the ROI due to rib shadowing. By moving the probe and the ROI to another location, a more homogeneous image (b) is obtained.

31x43mm (300 x 300 DPI)

1  
2  
3  
4  
5  
6  
7  
8  
9  
10  
11  
12  
13  
14  
15  
16  
17  
18  
19  
20  
21  
22  
23  
24  
25  
26  
27  
28  
29  
30  
31  
32  
33  
34  
35  
36  
37  
38  
39  
40  
41  
42  
43  
44  
45  
46  
47  
48  
49  
50  
51  
52  
53  
54  
55  
56  
57  
58  
59  
60

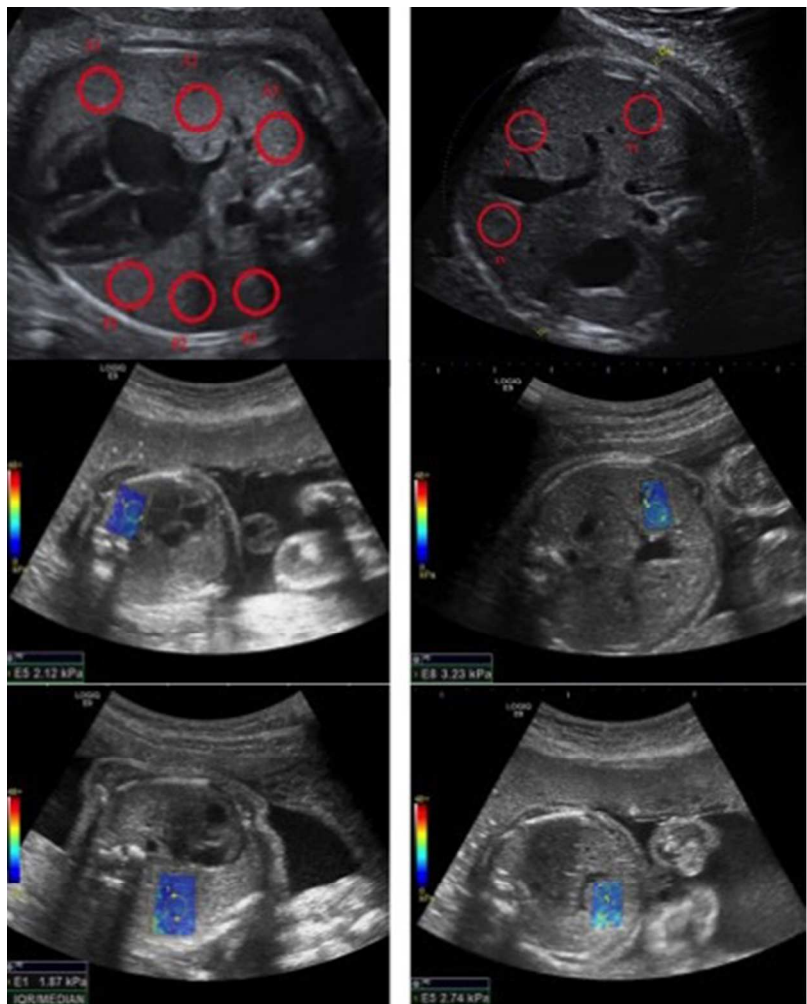

Measurement sites with SWE: 3 measurements on the proximal lung (anterior "P1", medium "P2" and posterior portion "P3"), 3 measurements on the distal lung (anterior "D1", medium "D2" and posterior portion "D3") and 3 measurements on 3 liver segments (IV, V, VI).

33x42mm (300 x 300 DPI)

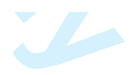

STROBE 2007 (v4) Statement—Checklist of items that should be included in reports of *case-control studies*

| Section/Topic                | Item # | Recommendation                                                                                                                                                                       | Reported on page # |
|------------------------------|--------|--------------------------------------------------------------------------------------------------------------------------------------------------------------------------------------|--------------------|
| Title and abstract           | 1      | (a) Indicate the study's design with a commonly used term in the title or the abstract                                                                                               | 3                  |
|                              |        | (b) Provide in the abstract an informative and balanced summary of what was done and what was found                                                                                  | 3                  |
| <b>Introduction</b>          |        |                                                                                                                                                                                      |                    |
| Background/rationale         | 2      | Explain the scientific background and rationale for the investigation being reported                                                                                                 | 4                  |
| Objectives                   | 3      | State specific objectives, including any prespecified hypotheses                                                                                                                     | 5,6                |
| <b>Methods</b>               |        |                                                                                                                                                                                      |                    |
| Study design                 | 4      | Present key elements of study design early in the paper                                                                                                                              | 8                  |
| Setting                      | 5      | Describe the setting, locations, and relevant dates, including periods of recruitment, exposure, follow-up, and data collection                                                      | 8                  |
| Participants                 | 6      | (a) Give the eligibility criteria, and the sources and methods of case ascertainment and control selection. Give the rationale for the choice of cases and controls                  | 8,9                |
|                              |        | (b) For matched studies, give matching criteria and the number of controls per case                                                                                                  |                    |
| Variables                    | 7      | Clearly define all outcomes, exposures, predictors, potential confounders, and effect modifiers. Give diagnostic criteria, if applicable                                             | 9,10               |
| Data sources/<br>measurement | 8*     | For each variable of interest, give sources of data and details of methods of assessment (measurement). Describe comparability of assessment methods if there is more than one group | 9,10,11            |
| Bias                         | 9      | Describe any efforts to address potential sources of bias                                                                                                                            | 11                 |
| Study size                   | 10     | Explain how the study size was arrived at                                                                                                                                            | 11                 |
| Quantitative variables       | 11     | Explain how quantitative variables were handled in the analyses. If applicable, describe which groupings were chosen and why                                                         | 11,12              |
| Statistical methods          | 12     | (a) Describe all statistical methods, including those used to control for confounding                                                                                                | 12                 |
|                              |        | (b) Describe any methods used to examine subgroups and interactions                                                                                                                  | 12                 |
|                              |        | (c) Explain how missing data were addressed                                                                                                                                          | 12                 |
|                              |        | (d) If applicable, explain how matching of cases and controls was addressed                                                                                                          | 12                 |
|                              |        | (e) Describe any sensitivity analyses                                                                                                                                                | 12                 |
| <b>Results</b>               |        |                                                                                                                                                                                      | 12                 |

|                          |     |                                                                                                                                                                                                              |     |
|--------------------------|-----|--------------------------------------------------------------------------------------------------------------------------------------------------------------------------------------------------------------|-----|
| Participants             | 13* | (a) Report numbers of individuals at each stage of study—eg numbers potentially eligible, examined for eligibility, confirmed eligible, included in the study, completing follow-up, and analysed            | 8,9 |
|                          |     | (b) Give reasons for non-participation at each stage                                                                                                                                                         | 10  |
|                          |     | (c) Consider use of a flow diagram                                                                                                                                                                           | 10  |
| Descriptive data         | 14* | (a) Give characteristics of study participants (eg demographic, clinical, social) and information on exposures and potential confounders                                                                     | 8,9 |
|                          |     | (b) Indicate number of participants with missing data for each variable of interest                                                                                                                          |     |
| Outcome data             | 15* | Report numbers in each exposure category, or summary measures of exposure                                                                                                                                    |     |
| Main results             | 16  | (a) Give unadjusted estimates and, if applicable, confounder-adjusted estimates and their precision (eg, 95% confidence interval). Make clear which confounders were adjusted for and why they were included |     |
|                          |     | (b) Report category boundaries when continuous variables were categorized                                                                                                                                    |     |
|                          |     | (c) If relevant, consider translating estimates of relative risk into absolute risk for a meaningful time period                                                                                             |     |
| Other analyses           | 17  | Report other analyses done—eg analyses of subgroups and interactions, and sensitivity analyses                                                                                                               |     |
| <b>Discussion</b>        |     |                                                                                                                                                                                                              |     |
| Key results              | 18  | Summarise key results with reference to study objectives                                                                                                                                                     | 13  |
| Limitations              | 19  | Discuss limitations of the study, taking into account sources of potential bias or imprecision. Discuss both direction and magnitude of any potential bias                                                   | 15  |
| Interpretation           | 20  | Give a cautious overall interpretation of results considering objectives, limitations, multiplicity of analyses, results from similar studies, and other relevant evidence                                   | 14  |
| Generalisability         | 21  | Discuss the generalisability (external validity) of the study results                                                                                                                                        | 14  |
| <b>Other information</b> |     |                                                                                                                                                                                                              |     |
| Funding                  | 22  | Give the source of funding and the role of the funders for the present study and, if applicable, for the original study on which the present article is based                                                | 2   |

\*Give information separately for cases and controls in case-control studies and, if applicable, for exposed and unexposed groups in cohort and cross-sectional studies.

**Note:** An Explanation and Elaboration article discusses each checklist item and gives methodological background and published examples of transparent reporting. The STROBE checklist is best used in conjunction with this article (freely available on the Web sites of PLoS Medicine at <http://www.plosmedicine.org/>, Annals of Internal Medicine at <http://www.annals.org/>, and Epidemiology at <http://www.epidem.com/>). Information on the STROBE Initiative is available at [www.strobe-statement.org](http://www.strobe-statement.org).

# BMJ Open

## Feasibility of 2-D ultrasound shear wave elastography of fetal lungs in case of threatened preterm labor: a study protocol



|                                 |                                                                                                                                                                                                                                                                                                                                                                                                                                                                                                                                                                                                                                                                                                                                                                                                                                                                                                                                                                                                                                                                                                                                                                    |
|---------------------------------|--------------------------------------------------------------------------------------------------------------------------------------------------------------------------------------------------------------------------------------------------------------------------------------------------------------------------------------------------------------------------------------------------------------------------------------------------------------------------------------------------------------------------------------------------------------------------------------------------------------------------------------------------------------------------------------------------------------------------------------------------------------------------------------------------------------------------------------------------------------------------------------------------------------------------------------------------------------------------------------------------------------------------------------------------------------------------------------------------------------------------------------------------------------------|
| Journal:                        | <i>BMJ Open</i>                                                                                                                                                                                                                                                                                                                                                                                                                                                                                                                                                                                                                                                                                                                                                                                                                                                                                                                                                                                                                                                                                                                                                    |
| Manuscript ID                   | bmjopen-2017-018130.R1                                                                                                                                                                                                                                                                                                                                                                                                                                                                                                                                                                                                                                                                                                                                                                                                                                                                                                                                                                                                                                                                                                                                             |
| Article Type:                   | Protocol                                                                                                                                                                                                                                                                                                                                                                                                                                                                                                                                                                                                                                                                                                                                                                                                                                                                                                                                                                                                                                                                                                                                                           |
| Date Submitted by the Author:   | 09-Aug-2017                                                                                                                                                                                                                                                                                                                                                                                                                                                                                                                                                                                                                                                                                                                                                                                                                                                                                                                                                                                                                                                                                                                                                        |
| Complete List of Authors:       | <p>MOTTET, Nicolas; University Hospital of Besançon, Department of Obstetrics and Gynecology ; Nanomedecine Laboratory, INSERM EA4662, University of Franche-Comte</p> <p>Aubry, Sébastien ; University Hospital of Besançon, Department of Radiology; University of Franche-Comte, Nanomedecine laboratory, INSERM EA4662</p> <p>Vidal, Chrystelle; University Hospital of Besançon, Centre d'investigation Clinique-Innovation Technologique 1431, INSERM</p> <p>Boiteux, Guillaume; University Hospital of Besançon, Centre d'investigation Clinique-Innovation Technologique 1431, INSERM</p> <p>Metz, Jean-Patrick; University Hospital of Besançon, Department of Obstetrics and Gynecology</p> <p>Riethmuller, Didier ; University Hospital of Besançon, Department of Obstetrics and Gynecology</p> <p>Pazart, Lionel; University Hospital of Besançon, Inserm Centre Investigation Clinique-Innovation Technologique 1431, INSERM; Inserm, CIC1431</p> <p>Ramanah, Rajeev; University Hospital of Besançon; University of Franche-Comte, Department of Obstetrics and Gynecology; Nanomedecine Laboratory, INSERM EA4662, University of Franche-Comte</p> |
| <b>Primary Subject Heading</b>: | Radiology and imaging                                                                                                                                                                                                                                                                                                                                                                                                                                                                                                                                                                                                                                                                                                                                                                                                                                                                                                                                                                                                                                                                                                                                              |
| Secondary Subject Heading:      | Obstetrics and gynaecology, Paediatrics                                                                                                                                                                                                                                                                                                                                                                                                                                                                                                                                                                                                                                                                                                                                                                                                                                                                                                                                                                                                                                                                                                                            |
| Keywords:                       | Ultrasonography < OBSTETRICS, Prenatal diagnosis < OBSTETRICS, Fetal medicine < OBSTETRICS, shear wave elastography, lung                                                                                                                                                                                                                                                                                                                                                                                                                                                                                                                                                                                                                                                                                                                                                                                                                                                                                                                                                                                                                                          |
|                                 |                                                                                                                                                                                                                                                                                                                                                                                                                                                                                                                                                                                                                                                                                                                                                                                                                                                                                                                                                                                                                                                                                                                                                                    |

SCHOLARONE™  
Manuscripts

1  
2  
3 **Feasibility of 2-D ultrasound shear wave elastography of fetal lungs in case of**  
4 **threatened preterm labor: a study protocol**  
5  
6  
7

8 Nicolas Mottet <sup>1,2</sup>, Sébastien Aubry <sup>2,3</sup>, Chrystelle Vidal <sup>4</sup>, Guillaume Boiteux <sup>4</sup>, Jean-Patrick  
9 Metz <sup>1</sup>, Didier Riethmuller <sup>1</sup>, Lionel Pazart <sup>4</sup>, Rajeev Ramanah <sup>1,2</sup>  
10

11  
12 <sup>1</sup> Pôle Mère-Femme, department of Obstetrics and Gynecology, University Hospital of  
13 Besançon; University of Franche-Comte, 25000 Besançon, France  
14

15 <sup>2</sup> Nanomedecine Laboratory, INSERM EA4662, University of Franche-Comte, 25000,  
16 Besançon, France.  
17

18 <sup>3</sup> Department of Musculoskeletal Imaging, University Hospital of Besançon, 25000 Besançon,  
19 France  
20

21 <sup>4</sup> Centre d'investigation Clinique-Innovation Technologique 1431, INSERM, University  
22 Hospital of Besançon, France.  
23  
24

25  
26  
27 Correspondence to:

28  
29 Nicolas MOTTET

30  
31 University Hospital of Besançon, Department of Obstetrics and Gynecology

32  
33 Alexander Fleming Boulevard

34  
35 25000 Besançon, France  
36

37  
38 Telephone number +33 381 21 88 95

39  
40 Fax number +33 381 21 86 13

41  
42 Email: [nemottet@gmail.com](mailto:nemottet@gmail.com)  
43  
44  
45  
46  
47  
48  
49  
50  
51  
52  
53  
54  
55  
56  
57  
58  
59  
60

1  
2  
3 **Contributors** : All the authors contributed to the conception and design of the study. NM,  
4 SA, and RR provided the idea for the research or article, created the hypothesis and wrote the  
5 original proposal. NM, CV, LP and RR significantly contributed to writing the paper. NM,  
6 CV, GB and LP wrote this protocol paper. All authors read and approved the final manuscript.  
7  
8  
9

10 **Funding:** This study is supported by University Hospital of Besançon, APICHU Réf:  
11 API/2015/60  
12

13  
14 **Competing interests** None declared.  
15

16  
17 Patient consent obtained.  
18  
19

20 **Ethics approval** The Human Research Ethics Committee (Comité de Protection des  
21 Personnes EST II, process number **15/494**)  
22  
23  
24  
25  
26  
27  
28  
29  
30  
31  
32  
33  
34  
35  
36  
37  
38  
39  
40  
41  
42  
43  
44  
45  
46  
47  
48  
49  
50  
51  
52  
53  
54  
55  
56  
57  
58  
59  
60



## ABSTRACT

### Introduction

2-D ultrasound Shear Wave Elastography (SWE) could be considered as a new noninvasive tool for monitoring fetal lung development based on evaluation of mechanical properties during pregnancy. Interesting results are available concerning use of SWE on developing organs, especially on premature infants and animals models. The main objective in this study is to evaluate feasibility of 2-D SWE in human fetal lungs between 24 and 34 weeks of gestation (WG). Secondary objective is to modelize fetal lung-to-liver elastography ratio (LLE ratio) and to assess variations between normal lung and lung surfactant-enriched after a corticosteroids course indicated for a threatened preterm labor (TPL).

### Methods and analysis

A prospective case-control study will be performed between 24 and 34 WG. Fetal lungs and liver will be explored by SWE into two groups: fetuses of women with an uncomplicated pregnancy (control group) and fetuses of women with a TPL requiring administration of corticosteroids (cases group). LLE Ratio will be defined as the value of the lung elasticity divided by the value of the liver elasticity.

Primary judgment criterion is the value of elasticity modulus expressed in kilopascal. Lungs and liver will be explored through three measurements to define the most reproducible regions with the lowest intra and inter-observer variability. Feasibility will be evaluated by assessing the number of exams performed and the number of exams with interpretable results. Intra and inter-observer reproducibility will be evaluated by means of the intra-class correlation coefficient.

### Ethics and dissemination

Approval of the study protocol was obtained from the human ethical research committee (Comité de Protection des Personnes EST II, process number 15/494) and the French National Agency for Medicines and Health Products Safety (process number 2015-A01575-44). All participants will sign a statement of informed consent.

**Trial Registration number:** NCT02870608

**Key words:** Shear wave elastography, stiffness, ultrasound, lung, prenatal

### Strengths and limitation of the study

- The study is designed to evaluate feasibility of 2-D ultrasound Shear Wave Elastography in human fetal lungs between 24 and 34 WG and to modelize fetal lung-to-liver elastography ratio (LLE ratio).
- This study will be the first one to demonstrate applicability of Shear Wave Elastography in human fetal lungs.
- Different factors will be taken into account to understand variability of measures: acquisition depth, number of measurements and representative values such as median or mean values.
- We shall not attempt to define reference value of fetal lung elasticity or to correlate SWE value with respiratory function at birth.

## INTRODUCTION:

### Background

Prenatal evaluation of fetal lung maturity (FLM) is still a challenge and different approaches have been reported with invasive biological tools or fetal imaging including ultrasounds and magnetic resonance imaging (MRI). FLM is mainly correlated with surfactant level and numerous tests have been developed to quantify this production: lecithin/sphingomyelin ratio (L/S), laminar body count, testing for Phosphatidyl glycerol with thin-layer chromatography, and estimation of the surfactant/albumin ratio using polarized light. All of these tests have been shown to have good sensitivity and negative predictive values; however, they all have a low positive predictive value and need invasive procedure<sup>1,2</sup>. Thus, amniocentesis for FLM became obsolete<sup>3</sup>.

Lung and liver signal or echogenicity were often compared as ratio to assess FLM in several studies<sup>4-10</sup>. Non-invasive assessment of FLM has been first attempted using ultrasonography quantified by gray level histogram<sup>4,11,12</sup>. These studies demonstrated sonographic changes associated with lung maturation but weak correlations between echogenicity and respiratory distress syndrome (RDS). Quantitative analysis with specific software has been secondly proposed to improve robustness. Fetal lung texture analysis with this method demonstrated a strong correlation with gestational age, biological test on amniotic fluid and risk of neonatal respiratory morbidity<sup>13, 14</sup>. Additionally, several studies found a significant association between fetal lung-to-liver signal intensity ratio and estimated gestational age with fetal Magnetic Resonance Imaging (MRI). Actually, this technique is mainly used to assess fetal lung development and volume, especially in case of congenital diaphragmatic hernia or severe oligohydramnios. Nevertheless, the accuracy of both MRI and ultrasounds for estimating long-term respiratory outcomes remains limited<sup>15-19</sup>. These previous technique propose prenatal evaluation of lung maturity based on imaging features, but prediction of the pulmonary function through prenatal biomechanical properties seems relevant. With this hypothesis, we advanced the concept of “prenatal functional imaging” and shear wave elastography (SWE) could be a promising tool.

SWE is a recent ultrasound technology using acoustic radiation force imaging (ARFI), which enables to assess the stiffness of tissues in real time through a color quantitative elastogram<sup>20</sup>. SWE assesses tissue elasticity (E), which is the tendency of tissue to resist deformation with an applied force. In locally homogeneous and purely elastic medium, we

1  
2  
3 can calculate Young's modulus (kPa) from the shear wave speed ( $\text{m}\cdot\text{s}^{-1}$ ) with the formula:  $E=$   
4  $3\rho\cdot c_{\text{sw}}^2$  ( $\rho$  being the medium density and  $c_{\text{sw}}$  the shear wave speed). The stiffness at any  
5 location of the ROI can be sampled using measurement tools to obtain a quantitative  
6 evaluation either in terms of shear wave speed or Young's modulus. A low shear wave speed  
7 corresponds to a soft tissue, while a shear wave high speed indicates a stiff tissue. Study of  
8 deep organs is possible with SWE because this method does not require any compression-  
9 relaxation sequence on the target organ. One of the advantages of SWE over other  
10 elastography methods is that the generation of the mechanical impulse is operator-  
11 independent. SWE is expanding its range nowadays by its promising role for examination of  
12 various organs (liver, thyroid) and for aiding discrimination of lesion characteristic, especially  
13 breast or prostate tumors<sup>21-24</sup>.

22 There is to date no publication regarding its use on human fetuses. The Food and Drug  
23 Administration (FDA) has so far, not yet approved use of SWE for obstetric clinical  
24 applications because of the paucity of data in the literature. Although there is no report about  
25 apparent histological changes with shear wave, the absence of others bioeffects could not be  
26 discarded and further studies are recommended<sup>25</sup>. However, setting parameters respect  
27 mechanical and thermal indexes for soft-tissues and bone, which are necessary to allow an  
28 obstetric examination defined by the FDA<sup>26</sup>. Thus, there is a debate concerning safety of SWE  
29 in fetal medicine. Herman et al studied the models and regulatory considerations for transient  
30 temperature rise during ARFI, and found that any transient increase in temperature caused by  
31 pulse bursts might still be within the safe limits determined by the (FDA)<sup>27</sup>. Others authors  
32 showed that transducer heating was below  $1^{\circ}\text{C}$  for the current clinical applications of ARFI.  
33 According to experimental studies that simulate the heating of soft tissue during ARFI, they  
34 demonstrate that ARFI on soft tissue is safe, provided that thermal index must be monitored  
35  
36  
37  
38  
39  
40  
41  
42  
43  
44  
45  
46  
47  
48  
49  
50  
51  
52  
53  
54  
55  
56  
57  
58  
59  
60

22 Interesting and reassuring results are available concerning use of SWE on developing  
23 organs, especially on premature infants and animals models. Principals organs explored are  
24 the liver, brain and lungs. Quarello et al demonstrated the possibility to use SWE in non-  
25 human primate fetuses and its feasibility to explore fetal organs. They found that elasticity  
26 values were related to organs and gestational age<sup>30</sup>. Concerning fetal lungs elasticity,  
27 measurements of the proximal lungs seem to increase throughout the pregnancy. Concerning  
28 use of SWE on premature infants, results are more numerous and include exploration of the  
29 liver or the brain. Alison et al. have demonstrated feasibility and reproducibility of liver

1  
2  
3 stiffness in preterm neonates with intra uterine growth restriction (IUGR) and gestational age  
4 at birth between 26-31 weeks of gestation (WG)<sup>31</sup>. Others studies reported contribution of  
5 SWE to the diagnosis of biliary atresia in neonates<sup>32,33</sup>. Kim et al described variation of brain  
6 elasticity in different regions in healthy neonates born between 28 and 40 WG<sup>34</sup>. Su et al  
7 quantitatively evaluated the effect of acoustic radiation force impulse imaging (ARFI) in  
8 neonatal brain development. The authors found that full-term neonates had significantly  
9 higher elasticity values than preterm neonates and there were no reported immediate adverse  
10 events<sup>35</sup>. Others teams work on application of this technology to neonates as a supplementary  
11 tool to detect early ischemic brain injury<sup>36</sup>.

12  
13  
14  
15  
16  
17  
18 If we describe fetal thorax centered on a 4-chamber view of the fetal heart with SWE,  
19 the following observations can be made (figure 1):  
20

- 21  
22  
23 - SWE is able to make distinction between fetal soft and stiff tissues. Fetal ribs  
24 appear red colored mapped whereas proximal lung appears blue colored.  
25  
26 - A homogeneous colored area can be obtained on the proximal lung with a  
27 color scale ranging from 0 to 48 kPa. A homogeneous ROI is important for  
28 the reliability of the results.  
29  
30 - SWE can differ according to the acquisition depth. Proximal lung appears  
31 with a blue homogenous distribution whereas distal lung appears with green  
32 homogenous distribution.  
33  
34  
35  
36  
37

## 38 Objectives

39  
40 The main objective in this study is to evaluate feasibility of 2-D SWE in human fetal  
41 lungs between 24 and 34 weeks of gestation (WG). Secondary objective is to modelize fetal  
42 lung-to-liver elastography ratio (LLE ratio) and to assess variations between normal lung and  
43 lung surfactant-enriched after a corticosteroids course indicated for a threatened preterm labor  
44 (TPL).  
45  
46  
47  
48  
49  
50  
51  
52  
53  
54  
55  
56  
57  
58  
59  
60

## METHODS/DESIGN

### Study design and setting

A prospective case-control study will be performed at the University Hospital of Besançon, (Besançon, France), Department of Obstetrics and Gynecology. Fetal lungs and liver will be explored by SWE between 24 and 34 WG in two groups: fetuses of women with an uncomplicated pregnancy will be considered as control group, and fetuses of women with a threatened preterm labor requiring administration of corticosteroids will be enrolled as cases. In this pilot study, corticosteroids generate an effect model interesting for assessment of LLE ratio variation in the cases. We take advantage of the action of corticosteroids to explore another medium with different supposed biomechanical properties. Indeed, corticosteroids accelerated development of type 2 pneumocytes leading to surfactant production. Similarly, there is a significant increase in saturated phosphatidylcholine content in fetal lung, modifying propagation of shear waves potentially<sup>37</sup>.

Control group will be recruited during routine prenatal visits or ultrasounds according to the French ultrasounds schedule (ultrasound screening during the second trimester between 20-25 WG and the third trimester between 30-35 WG<sup>38</sup>). Cases will be enrolled during their hospitalization for threatened preterm delivery (figure 2). The design, conduction and reporting of this study will follow the norms of the Strengthening the Reporting of Observational Studies in Epidemiology (STROBE) statement<sup>39</sup>.

### Ethical considerations

The study respects the ethical standards established in the declaration of Helsinki<sup>40</sup>. Investigators undertake to respect law no. 2004-806 of August 9,2004 relative to public health policy on clinical trials, made effective by implementing Decree 2006-477 of April 26,2006<sup>41</sup>. Approval of the study protocol was obtained from the human ethical research committee (Comité de Protection des Personnes EST II, process number **15/494**) and the French National Agency for Medicines and Health Products Safety (process number **2015-A01575-44**). The study is registered on clinical trial.gov with the following number: **NCT02870608**. All participants will sign a statement of informed consent and will be allowed to abandon the study at any time, with no negative consequences. All procedures of the study will be confidential. The study will involve collection and storage of ultrasound images and

1  
2  
3 study participants will therefore be thoroughly informed. All variables (patient parameters,  
4 data items, data elements) will be aggregated into electronic Case report Forms.  
5

6 As explained in the background, The Food and Drug Administration (FDA) has so far,  
7 not yet approved use of SWE for obstetric clinical applications because of the paucity of data  
8 in the literature. In this study, fetuses will be included from 24 to 34 WG, over the period of  
9 organogenesis. In the patient information sheet, it is specified that previous studies explored  
10 liver or brain of premature infants with SWE. Alison et al. studied liver stiffness in preterm  
11 neonates with intra uterine growth restriction (IUGR) and gestational age at birth between 26-  
12 31 WG<sup>31</sup>. Franchi-Abella et al evaluate feasibility and diagnostic accuracy of SWE for the  
13 assessment of liver stiffness in 96 patients and 7 were preterm newborns between 30-35 WG  
14<sup>42</sup>. Both studies did not report adverse outcomes and were approved by institutional review  
15 board. Moreover, consent form mentions conclusions of an experimental study of the  
16 biological effects associated with SWE in brains of neonatal mice. Results indicated that  
17 using SWE doe not cause detectable histologic changes. Potential effects on intracellular  
18 signaling pathways were detected when the SWE scanning lasted more than 30 min<sup>25</sup>. Thus,  
19 patients will be informed that our study is focused on fetuses with a gestational age similar to  
20 preterm newborn included in the above-mentioned studies. Moreover, exploration with SWE  
21 will concern only lung and liver with duration of less than 10 min in respect of biophysical  
22 safety indexes: Thermal index  $Ti \leq 0.7$  and Mechanical index  $Mi < 1,9$ .  
23  
24  
25  
26  
27  
28  
29  
30  
31  
32  
33  
34  
35

### 36 **Participants**

37  
38  
39 Cases will be recruited during hospitalization for a threatened preterm labor requiring  
40 administration of corticosteroids. The complementary inclusion criteria are: pregnant women  
41 aged 18 years or more, singleton pregnancy with eutrophic fetus, signature of consent and  
42 affiliation to health insurance scheme (figure 2). Patients will be stratified by gestational age  
43 between 24 and 34 WG, with one class every WG (10 classes in total) and 5 patients per class.  
44 After obtaining consent, a SWE exam will be performed before the first intramuscular  
45 administration of corticosteroids “day 0” (betamethasone 12mg). A second SWE exam will be  
46 performed within 24 h after the second intramuscular administration of corticosteroids “day  
47 2”. A third SWE will be performed between the fifth and the seventh day following the first  
48 administration of corticosteroids “day 5-7”, if the women are not early discharge at home.  
49  
50  
51  
52  
53  
54

55 For the control group, women will be matched by gestational age and will be recruited  
56 during their pregnancy monitoring. Information concerning the study will be given as early as  
57  
58  
59  
60



1  
2  
3 the second trimester by obstetrician or midwives during medical visits or ultrasounds. The  
4 complementary inclusion criteria are following: major pregnant women, uncomplicated  
5 pregnancy between 24 and 34 WG, singleton pregnancy with eutrophic fetus, signature of  
6 consent and affiliation to health insurance scheme. If they are willing to participate, a first  
7 SWE exam will be proposed at “day 0”, followed by a second one in two days “day 2”.  
8 Patients who come back for an SWE exam performed outside current medical visit will  
9 receive financial compensation for travel expenses. As well as cases, control patients will be  
10 stratified by gestational age between 24 and 34 WG.

11  
12 Exclusion criteria common to both groups are: Fetal lung or liver pathologies,  
13 inclusion in another medical study, patients under legal incapacity.  
14  
15

## 16 17 18 19 20 21 **Variables and measuring technique**

- 22 • **Prenatal variables**

23  
24  
25  
26 Primary judgment criterion is the value of Young’s modulus (E) (elasticity modulus)  
27 expressed in kilopascal (kPa). A Logic E9 system (General Electric Medical System,  
28 Milwaukee, WI, USA) with CE certification CE LNE/G-MED [CE0459] will be used for this  
29 study, equipped with abdominal convex probe 1-6 MHz (C1-6-D probe). This technique  
30 includes a real-time visualization of a color quantitative elastogram coupled to a B-mode  
31 image. To provide robust shear wave and optimize its detection, Logiq E9 uses innovative  
32 techniques. Comb-push Ultrasound SWE generates multiple shear wave sources into the  
33 region of interest (ROI) and uses directional filtering to remove the interference. The TAST  
34 technique is able to robustly track shear waves and correct for the sequential tracking delay<sup>43</sup>.  
35 This technique has the merit of rapid and solid reconstruction of a large elasticity map  
36 (elastogram) with the only single acquisition by generating multiple shear waves from  
37 multiple unfocused push beams.  
38  
39

40  
41 The shear wave acquisition measurement protocol is saved in a specific preset that will be  
42 used for every patient: 2D-Mode: Harmonic imaging central depth = 6 cm, frequency = 6  
43 MHz, Acoustic Power 100%; Elastography-Mode: Shear wave signal frequency ranges from  
44 50 to 400 kHz, Acoustic power of the pushing beam: 100%, Tracking power: 100%, color  
45 scale ranging from 0 to 48 kPa. Biophysical safety indices: Thermal index  $T_i \leq 0.7$  and  
46 Mechanical index  $M_i < 1,9$  (table 1).  
47  
48

49  
50 Fetal lungs will be voluntarily approached laterally to systematically obtain proximal  
51  
52  
53  
54  
55  
56



1  
2  
3 and distal lungs regarding the distance to the probe. Each measurement has to be performed  
4 on a homogeneous elastogram to be valid. Operators will perform 2 cycles of 9 Young's  
5 modulus measurements while systematically repositioning the probe on each target organ.  
6

7  
8 A cycle includes: 3 measurements on the proximal lung (anterior "P1", medium "P2" and  
9 posterior portion "P3"), 3 measurements on the distal lung (anterior "D1", medium "D2" and  
10 posterior portion "D3") and 3 measurements on 3 liver segments (IV, V, VI) (figure 3).  
11 Implementation of Shear Wave elastography displays 2D images of Young's Modulus in the  
12 target organ. In real time, the elasticity appears color coded, where blue identifies deformable  
13 tissue and red indicates rigid tissues. The Young's modulus value at any location will be  
14 sampled using a round ROI of 5 mm. Distance between the probe and the target organ will be  
15 collected. The average elasticity in the ROI will be automatically recorded by the system in a  
16 worksheet. The investigators will adjust the position of the ROI using the B-mode image for  
17 guidance and take care to obtain the most homogeneous color coded ROI before Young's  
18 modulus estimation (figure 4). Technical failure was defined as failure to obtain a  
19 homogeneous elastogram in more than 50% in the sampling area. To test the inter-observer  
20 variability, a second observer will successively perform measurements on 30 fetuses. All  
21 measurements will be carried out directly by ultrasound on the target organ. The second  
22 observer will perform measurements just after the first one and will be blinded to the  
23 feasibility and results obtained by the first one.  
24  
25  
26  
27  
28  
29  
30  
31  
32  
33

34 Estimation of Fetal Weight Estimation (EFW) will be performed during each exam  
35 according to Hadlock formula based on Cephalic circumference (CC), Abdominal  
36 circumference (AC) and femoral length (FL):  $\log_{10} EFW = 1,326 + 0,0107 PC + 0,0438 PA$   
37  $+ 0,158 LF + 0,00326 (PA \times LF)$  <sup>44</sup>.  
38  
39  
40  
41

42 • **Postnatal variables**  
43  
44

45 The following pharmacovigilance data will be collected at birth and 3 months later in  
46 order to assess safety of the device:  
47

48 - At birth in both groups: term of birth, weight, neonatal transfer, Apgar Score and  
49 evaluation of respiratory distress by Silverman Score <sup>45</sup>.  
50

51 - Three months after birth: medical history, health problems, respiratory diseases or  
52 symptoms, liver disease or symptoms and number of hospitalization since birth.  
53  
54  
55  
56

57 **Limitation of Bias**  
58  
59  
60

1  
2  
3 Use of sampling method with 5 patients per class of gestational age will limit  
4 repartition bias between control and cases. Inclusion of any pregnant women attending  
5 Besançon University maternity for the control group, and inclusion of all women with a  
6 threatened preterm labor will limit risk of selection bias. Risk of loss will be limited in the  
7 cases group between “day 0” and “day 2” because patients will remain hospitalized for  
8 corticosteroids administration. Nevertheless, risk of loss is most important between “day 2”  
9 and “day 5-7” because of possible early discharge at home after the second administration of  
10 corticosteroids. For ethical and medical reasons, cases early discharge at home cannot be  
11 convened in “day 5-7”. Risk of loss will be limited in the control group because of a financial  
12 compensation for travel expenses. To limit inter-observer variation, expert sonographers will  
13 perform elastography exams.  
14  
15  
16  
17  
18  
19  
20  
21

### 22 **Study size**

23  
24  
25 Because of the paucity of data regarding SWE on human fetal lung, the sample size  
26 calculation was based on measurements of fetal lungs in pregnant baboons and extrapolations  
27 made by clinicians, with the following assumptions: average expected value of elasticity  
28 coefficient for fetal lung will be 2 KPa at 24 WG and 4 KPa at 34 WG. We hypothesized a  
29 linear increase of elasticity coefficient during pregnancy in the control group and a decrease  
30 in cases exposed to corticosteroids. At “day 2”, we therefore expect in the cases a variation of  
31 0.2 KPa (corresponding to one week of lung maturation during gestation). Forty-two patients  
32 per group will be needed to have 90% power to statistically demonstrate such a difference  
33 (0.2 versus 0.057) assuming an  $\alpha$  risk of 0.05 and standard deviation of 0.2.  
34  
35  
36  
37  
38  
39  
40  
41  
42

### 43 **Proposed statistical analysis**

- 44 • **Technical validation:**

45  
46  
47  
48  
49 Feasibility will be evaluated by assessing the number of exams performed and the number  
50 of exams with interpretable results. All the variables and data that will be stored for each  
51 SWE exam are summarized in table 1. Intra and inter-observer reproducibility will be  
52 evaluated by the intra-class correlation coefficient (ICC) with 95% IC. Intra-observer  
53 reproducibility will be calculated using the two cycles of measure, inter observer  
54 reproducibility between the operators will be calculated for means of the two cycles of  
55  
56  
57  
58  
59  
60

measures if intra-observer is high<sup>46</sup>. Only repeatable and reproducible values of each ROI will be considered to modelize LLE ratio.

**Table 1:** Variables and data stored for each Shear Wave Elastography Exam.  
*ROI (Region of interest)*

| Maternal                                                                                                                                                                                          | Fetal                                                                                                                                                                                                                                                                                                                                                                                                                 | Technical                                                                                                                                                                                                                                                                                                                                                                                                                                                                                |
|---------------------------------------------------------------------------------------------------------------------------------------------------------------------------------------------------|-----------------------------------------------------------------------------------------------------------------------------------------------------------------------------------------------------------------------------------------------------------------------------------------------------------------------------------------------------------------------------------------------------------------------|------------------------------------------------------------------------------------------------------------------------------------------------------------------------------------------------------------------------------------------------------------------------------------------------------------------------------------------------------------------------------------------------------------------------------------------------------------------------------------------|
| <ul style="list-style-type: none"> <li>▪ Age (years)</li> <li>▪ Weeks of gestation</li> <li>▪ Body mass Index (kg/m<sup>2</sup>)</li> <li>▪ Subcutaneous adipose tissue thickness (cm)</li> </ul> | <ul style="list-style-type: none"> <li>▪ Presentation:               <ul style="list-style-type: none"> <li>- Cephalic</li> <li>- Breech</li> <li>- Transverse</li> </ul> </li> <li>▪ Weight (grams)</li> <li>▪ Placenta:               <ul style="list-style-type: none"> <li>- Position: anterior, posterior, lateral, fundal</li> <li>- Thickness (cm)</li> </ul> </li> <li>▪ Amniotic fluid index (cm)</li> </ul> | <ul style="list-style-type: none"> <li>▪ Young's modulus (kPa) in 9 ROI:               <ul style="list-style-type: none"> <li>- Proximal lung: P1, P2, P3</li> <li>- Distal lung: D1, D2, D3</li> <li>- Liver: IV, V, VI</li> </ul> </li> <li>▪ Distance between probe and target ROI for each measurement (cm)</li> <li>▪ Biophysical safety indices:               <ul style="list-style-type: none"> <li>- Mechanical index (Mi)</li> <li>- Thermal index (Ti)</li> </ul> </li> </ul> |

- **Clinical evaluation**

Evolution of fetal lung SWE, fetal liver SWE and lung-to-liver-SWE ratio will be assessed by group and overall. Lung-to-liver-SWE Ratio will be initially defined as the value of the lung elasticity divided by the value of the liver elasticity.

SWE values before corticosteroids administration will be compared between cases and control groups. If there is a statistically significant difference, a confusional bias will have to be sought between fetal lung elasticity values and threatened preterm labor. All results will be presented as “delta” variation between two measurements in order to limit “non-comparability bias” between both groups. If corticosteroids affect fetal lung elasticity, “delta before/after” will be more important in cases than controls.

Analysis of mean differences between groups will be carried out using a Student's test or Wilcoxon test according to distribution of data for quantitative variables. Shapiro-Wilk test

1  
2  
3 will be used to determine if data set is well modeled by a normal distribution. The relationship  
4 of quantitative variables to each other will be tested using Pearson's or Spearman's  
5 correlation as appropriate.  
6  
7

8 Qualitative variable will be expressed as frequencies and quantitative variables will be  
9 displayed as the mean  $\pm$  SD if normally distributed or as the median  $\pm$  IQR (Inter Quartile  
10 Range) if asymmetrically distributed. Qualitative variables will be analyzed using a  $\chi^2$  test or  
11 Fisher test.  
12  
13

14 For statistical analyses, the level of statistical significance will be set at 5% ( $p < 0.05$ ).  
15 Statistical analysis will be performed with statistical software SAS for Windows, version 9.4  
16 and MedCalc software, version 15.  
17  
18  
19  
20  
21  
22  
23  
24  
25  
26  
27  
28  
29  
30  
31  
32  
33  
34  
35  
36  
37  
38  
39  
40  
41  
42  
43  
44  
45  
46  
47  
48  
49  
50  
51  
52  
53  
54  
55  
56  
57  
58  
59  
60

## DISCUSSION

2D-SWE could be considered as a new noninvasive tool for monitoring fetal lung development based on evaluation of mechanical properties during pregnancy. However, standardization for measuring SWE in human fetal lung is necessary to demonstrate applicability of the technique, and to understand limiting factors. This pilot study will focus on technical performances before considering clinical applications. In this protocol, SWE will be used after fetal period of organogenesis and pharmacovigilance data will be collected at birth and 3 months later in order to assess safety of the device.

With the study design, we shall not attempt to define reference value of fetal lung elasticity during pregnancy or to correlate SWE value with respiratory function at birth. The main objective is to evaluate feasibility and reproducibility of 2D-SWE in human fetal lung between 24 and 34 WG and to modelize a new LLE ratio. Indeed, each target organ will be explored through three measurements to define the most relevant and reproducible regions with the lowest intra and inter-observer variability. Use of LLE ratio is interesting because it allows comparison between two tissues in which the liver is taken as a reference organ. Several studies indicate that liver signal or echogenicity remain constant through gestation suggestive of a regular evolution of the tissue characteristics<sup>47,48</sup>. Thus, we will compare evolution of SWE values between two organs subjected to the same technical variations, especially for depth. Both lung and liver tissue density increase during pregnancy and we expect a linear increase of SWE values of these organs. In case of variations of lung SWE values after a course of corticosteroids, LLE ratio should be modified. If we suppose that liver elasticity will be constant between two separate exams of 48h, LLE ratio will decrease if corticosteroids lead to attenuation of shear wave speed. Conversely, if lung elasticity increases after a course of corticosteroids, LLE ratio will also increase.

One advantage of this protocol is to evaluate SWE in three tissues with different supposed biomechanical properties: normal lung, lung with increase of surfactant synthesis after corticosteroids course, and liver. Corticosteroids generate an effect model interesting for assessment of LLE's ratio variation in the cases because of a significant increase of phosphatidylcholine content in fetal lungs. This effect is mediated by an activation of choline-phosphate cytidyltransferase<sup>37</sup>. Given the placental transfer and time to induce cellular mechanism of transcription, an artificial delay of 24h seems to be necessary to produce surfactant in pneumocytes type 2. The benefit of corticosteroid administration is greatest at 2–

1  
2  
3 7 days after the initial dose <sup>49,50</sup>. Two approaches can be proposed after a complete course of  
4 corticosteroids. On the one hand, SWE of fetal lung could increase because corticosteroids  
5 accelerate FLM, and we could expect an advanced ripening by one WG. On the other hand,  
6 increase in phospholipids content in fetal lung after corticosteroids could increase viscosity  
7 and lead to dispersion of shear wave speed and attenuation.  
8  
9  
10

11  
12 Different factors will be taken into account in this study to understand variability of  
13 measures: acquisition depth, number of measurements and representative values such as  
14 median or mean values. Shear wave velocity can be different according to the acquisition  
15 depth and this parameter is gradually underestimated with increasing depth. Effect is greatest  
16 in stiff tissues but little effect is seen in soft target <sup>51-53</sup>. This phenomenon might be explained  
17 by a damping of the acoustic push pulse that generates the shear waves by both increased  
18 attenuation and increased stiffness of the target <sup>54</sup>. Thus, we expected low variation between  
19 proximal and distal lung because they may be considered as soft tissues. There are also  
20 debates about the acquisition number during SWE and the designers of the device did not  
21 provided advices. The number of measurements (NMs) reported in the recent literature on  
22 various organs is inconsistent (commonly seen are 3, 4 and 5 NMs) <sup>55-56</sup>. Quarello et al  
23 reported 3 NMs on fetal lungs in pregnant baboons and ICC for and inter observer variability  
24 were better for an average value of three measurements <sup>57</sup>. For Alison et al, 9 NMs were  
25 performed on liver in preterm neonates with intra uterine growth restriction (3 measurements  
26 from three different liver segments). Measurements showed high reproducibility on average  
27 values (ICC = 0.94–0.98 for intra-operator, 0.86 for inter-operator) <sup>31</sup>. One objective of our  
28 protocol is to determine the NM's necessary to evaluate fetal lung SWE with a good inter and  
29 intra-observer reproducibility. Thus, each value will be analyzed to determine if mean lung  
30 and liver SWE can be achieved through only 1 valid measurement or more, and if its  
31 performance is equivalent to 2 or 3 valid measurements.  
32  
33  
34  
35  
36  
37  
38  
39  
40  
41  
42  
43  
44  
45

46 To sum up, we hope that the results of this study will contribute to clarify applicability  
47 of SWE on human fetal lung between 24 and 34WG. SWE could be a new tool for reliable  
48 prediction of lung development through biomechanical properties. This study will be the first  
49 one to propose a protocol of measurement underlying limiting factors.  
50  
51  
52  
53  
54  
55  
56  
57  
58  
59  
60

## REFERENCES

1. Bhagwanani SG, Fahmy D, Turnbull AC. Prediction of neonatal respiratory distress by estimation of amniotic-fluid lecithin. *Lancet*. 1972;1(7743):159-62.
2. Field NT, Gilbert WM. Current status of amniotic fluid tests of fetal maturity. *Clin Obstet Gynecol*. 1997;40(2):366-86.
3. Varner S, Sherman C, Lewis D et al. Amniocentesis for Fetal Lung Maturity: Will It Become Obsolete? *Rev Obstet Gynecol*. 2013;6(3-4):126-34.
4. Maeda K, Utsu M, Yamamoto N, Serizawa M. Echogenicity of fetal lung and liver quantified by the grey-level histogram width. *Ultrasound Med Biol*. 1999;25(2):201-8.
5. Duncan KR, Gowland PA, Moore RJ et al. Assessment of fetal lung growth in utero with echo-planar MR imaging. *Radiology*. 1999;210(1):197-200.
6. Moshiri M, Mannelli L, Richardson ML et al. Fetal lung maturity assessment with MRI fetal lung-to-liver signal-intensity ratio. *AJR Am J Roentgenol*. 2013;201(6):1386-90.
7. Oka Y, Rahman M, Sasakura C et al. Prenatal diagnosis of fetal respiratory function: evaluation of fetal lung maturity using lung-to-liver signal intensity ratio at magnetic resonance imaging. *Prenat Diagn*. 2014;34(13):1289-94.
8. Gorincour G, Bach-Segura P, Ferry-Juquin M et al. Lung signal on fetal MRI: normal values and usefulness for congenital diaphragmatic hernia. *J Radiol*. 2009;90(1 Pt 1):53-8.
9. Beck APA, Araujo Júnior E, Leslie ATFS et al. Assessment of fetal lung maturity by ultrasound: objective study using gray-scale histogram. *J Matern-Fetal Neonatal Med*. 2015;28(6):617-22.
10. Fried AM, Loh FK, Umer MA, et al. Echogenicity of fetal lung: relation to fetal age and maturity. *AJR Am J Roentgenol*. 1985;145(3):591-4.
11. Serizawa M, Maeda K. Noninvasive fetal lung maturity prediction based on ultrasonic gray level histogram width. *Ultrasound Med Biol*. 2010;36(12):1998-2003.
12. Prakash KNB, Ramakrishnan AG, Suresh S, Chow TWP. Fetal lung maturity analysis using ultrasound image features. *IEEE*. 2002;6(1):38-45.
13. Bonet-Carne E, Palacio M, Cobi T et al. Quantitative ultrasound texture analysis of fetal lungs to predict neonatal respiratory morbidity. *Ultrasound Obstet Gynecol* 2015;45(4):427-33.
14. Palacio M, Bonet-Carne E, Cobo T et al. Prediction of neonatal respiratory morbidity by quantitative ultrasound lung texture analysis: a multicenter study. *Am J Obstet Gynecol*. 2017; Epub ahead of print.
15. Cannie M, Jani J, Meersschaert J, et al. Prenatal prediction of survival in isolated diaphragmatic hernia using observed to expected total fetal lung volume determined by magnetic resonance imaging based on either gestational age or fetal body volume.



- 1  
2  
3 *Ultrasound Obstet Gynecol.* 2008;32(5):633-9.
- 4  
5 16. Kastenholz KE, Weis M, Hagelstein C, et al. Correlation of Observed-to-Expected MRI  
6 Fetal Lung Volume and Ultrasound Lung-to-Head Ratio at Different Gestational Times  
7 in Fetuses With Congenital Diaphragmatic Hernia. *AJR Am J Roentgenol.*  
8 2016;206(4):856-66.
- 9  
10 17. Kehl S, Becker L, Eckert S et al. Prediction of mortality and the need for neonatal  
11 extracorporeal membrane oxygenation therapy by 3-dimensional sonography and  
12 magnetic resonance imaging in fetuses with congenital diaphragmatic hernias. *J*  
13 *Ultrasound Med.* 2013;32(6):981-8.
- 14  
15 18. Strizek B, Cos Sanchez T, Khalifé J, et al. Impact of operator experience on the  
16 variability of fetal lung volume estimation by 3D-ultrasound (VOCAL) and magnetic  
17 resonance imaging in fetuses with congenital diaphragmatic hernia. *J Matern-Fetal*  
18 *Neonatal Med.* 2015;28(7):858-64.
- 19  
20 19. Rubesova E. Why do we need more data on MR volumetric measurements of the fetal  
21 lung? *Pediatr Radiol.* 2016;46(2):167-71.
- 22  
23 20. Bercoff J, Pernot M, Tanter M, et al. Monitoring thermally-induced lesions with  
24 supersonic shear imaging. *Ultrasound Imaging.* 2004;26(2):71-84.
- 25  
26 21. Erkan M, Canberk S, Kilicoglu GZ, et al. Avoidance of unnecessary fine-needle  
27 aspiration with the use of the Thyroid Imaging Reporting Data System classification  
28 and strain elastography based on The Bethesda System for Reporting Thyroid  
29 Cytopathology. *Mol Clin Oncol.* 2016;5(5):625-30.
- 30  
31 22. Rouvière O, Melodelima C, Hoang Dinh A, et al. Stiffness of benign and malignant  
32 prostate tissue measured by shear-wave elastography: a preliminary study. *Eur Radiol.*  
33 août 2016; 27(5):1858-1866.
- 34  
35 23. Denis M, Gregory A, Bayat M, et al. Correlating Tumor Stiffness with  
36 Immunohistochemical Subtypes of Breast Cancers: Prognostic Value of Comb-Push  
37 Ultrasound Shear Elastography for Differentiating Luminal Subtypes. *PloS One.*  
38 2016;11(10):e0165003.
- 39  
40 24. Menten R, Leonard A, Clapuyt P et al. Transient elastography in patients with cystic  
41 fibrosis. *Pediatr Radiol.* 2010;40(7):1231-5.
- 42  
43 25. Li C, Zhang C, Li J, Cao X, Song D. An Experimental Study of the Potential Biological  
44 Effects Associated with 2-D Shear Wave Elastography on the Neonatal Brain.  
45 *Ultrasound Med Biol.* 2016;42(7):1551-9.
- 46  
47 26. Fowlkes JB, Bioeffects Committee of the American Institute of Ultrasound in Medicine.  
48 American Institute of Ultrasound in Medicine consensus report on potential bioeffects of  
49 diagnostic ultrasound: executive summary. *J Ultrasound Med.* 2008;27(4):503-15.
- 50  
51 27. Herman BA, Harris GR. Models and regulatory considerations for transient temperature  
52 rise during diagnostic ultrasound pulses. *Ultrasound Med Biol.* 2002; 28:1217-1224
- 53  
54 28. Palmeri ML, Frinkley KD, Nightingale KR. Experimental studies of the thermal effects
- 55  
56  
57  
58  
59  
60



- 1  
2  
3 associated with radiation force imaging of soft tissue. □ *Ultrasound Imaging*. 2004; 26:  
4 100–114. □  
5  
6 29. Karaman E. Response to ‘Safety of elastography applied to the placenta: Be careful with  
7 ultrasound radiation force’. *J. Obst. Gynaecol. Res* 2017. Epub ahead of print.  
8  
9 30. Quarello E, Lacoste R, Mancini J et al. Feasibility and reproducibility of  
10 ShearWave(TM) elastography of fetal baboon organs. *Prenat Diagn*. 2015; 35(11):1112-  
11 6.  
12  
13 31. Alison M, Biran V, Tanase A, Bendavid M, et al. Quantitative Shear-Wave Elastography  
14 of the Liver in Preterm Neonates with Intra-Uterine Growth Restriction. *PloS One*.  
15 2015;10(11):e0143220.  
16  
17 32. Hanquinet S, Rougemont A-L, Courvoisier D, et al. Acoustic radiation force impulse  
18 (ARFI) elastography for the noninvasive diagnosis of liver fibrosis in children. *Pediatr*  
19 *Radiol*. 2013;43(5):545–51.  
20  
21 33. Hanquinet S, Courvoisier DS, Rougemont A-L et al. Contribution of acoustic radiation  
22 force impulse (ARFI) elastography to the ultrasound diagnosis of biliary atresia. *Pediatr*  
23 *Radiol*. 2015;45(10):1489–95.  
24  
25 34. Kim HG, Park MS, Lee J-D, Park SY. Ultrasound Elastography of the Neonatal Brain:  
26 Preliminary Study. *J Ultrasound Med*. 17 mars 2017; [Epub ahead of print]  
27  
28 35. Su Y, Ma J, Du L, et al. Application of acoustic radiation force impulse imaging (ARFI)  
29 in quantitative evaluation of neonatal brain development. *Clin Exp Obstet Gynecol*.  
30 2015;42(6):797–800.  
31  
32 36. Bailey C, Huisman TAGM, de Jong RM, et al. Contrast-Enhanced Ultrasound and  
33 Elastography Imaging of the Neonatal Brain: A Review. *J Neuroimaging*. 2017; [Epub  
34 ahead of print]  
35  
36 37. Post M, Barsoumian A, Smith BT. The cellular mechanism of glucocorticoid  
37 acceleration of fetal lung maturation. Fibroblast-pneumonocyte factor stimulates  
38 choline-phosphate cytidylyltransferase activity. *J Biol Chem*. 1986;261(5):2179–84.  
39  
40 38. Rapport de la Conférence Nationale en Echographie Obstetricale et Fœtale.  
41 L’echographie de dépistage prénatal CNEOF . 14 juillet 2016 [Internet]. available at:  
42 <http://www.cfef.org/archives/bricabrac/cneof/rapportcneof2016.pdf>  
43  
44 39. Noah N. The STROBE initiative: STrengthening the Reporting of OBservational studies  
45 in Epidemiology (STROBE). *Epidemiol Infect*. 2008;136(7):865.  
46  
47 40. World Medical Association. World Medical Association Declaration of Helsinki: ethical  
48 principles for medical research involving human subjects. *JAMA*. 2013;310(20):2191–4.  
49  
50 41. Maillols-Perroy A-C, Tillet Y. [The adoption of Jardé law modifies the legal framework  
51 of clinical research in France]. *Therapie*. avr 2012;67(2):77–87.  
52  
53 42. Franchi-Abella S, Corno L, Gonzales E, et al. Feasibility and Diagnostic Accuracy of  
54 Supersonic Shear-Wave Elastography for the Assessment of Liver Stiffness and Liver  
55  
56  
57  
58  
59  
60

- 1  
2  
3 Fibrosis in Children: A Pilot Study of 96 Patients. *Radiology*. 2016;278(2):554-62.  
4  
5 43. Song P, Macdonald MC, Behler RH, et al. Two-dimensional Shear Wave Elastography  
6 on Conventional Ultrasound Scanners with Time Aligned Sequential Tracking (TAST)  
7 and Comb-push Ultrasound Shear Elastography (CUSE). *Trans Ultrason Ferroelectr*  
8 *Freq Control*. 2015;62(2):290.  
9  
10 44. Hadlock FP, Harrist RB, Carpenter RJ, et al. Sonographic estimation of fetal weight. The  
11 value of femur length in addition to head and abdomen measurements. *Radiology*.  
12 1984;150(2):535-40.  
13  
14 45. Silverman WA, Andersen DH. A controlled clinical trial of effects of water mist on  
15 obstructive respiratory signs, death rate and necropsy findings among premature infants.  
16 *Pediatrics*. 1956;17(1):1-10.  
17  
18 46. Bland JM, Altman DG. Statistical methods for assessing agreement between two  
19 methods of clinical measurement. *Lancet*. 1986;1(8476):307-10.  
20  
21 47. Dubinsky T, Moshiri M, Waldorf KA, et al. Increased fetal lung T2 signal is not due to  
22 increasing surfactant concentration: an in vitro T2 mapping analysis. *Prenat Diagn*.  
23 2017. 37(3):211-214  
24  
25 48. Mills M, Winter TC, Kennedy AM, et al. Determination of fetal lung maturity using  
26 magnetic resonance imaging signal intensity measurements. *Ultrasound Q*.  
27 2014;30(1):61-7.  
28  
29 49. Mulder EJ, Derks JB, Visser GH. Antenatal corticosteroid therapy and fetal behaviour: a  
30 randomised study of the effects of betamethasone and dexamethasone. *Br J Obstet*  
31 *Gynaecol*.1997;104(11):1239-47.  
32  
33 50. Loehle M, Schwab M, Kadner MS, et al. Dose-response effects of betamethasone on  
34 maturation of the fetal sheep lung. *Am J Obstet Gynecol*. 2010;202(2):186.e1.  
35  
36 51. Shin N-Y, Kim M-J, Lee M-J, et al. Transient elastography and sonography for  
37 prediction of liver fibrosis in infants with biliary atresia. *J Ultrasound Med*.  
38 2014;33(5):853-64.  
39  
40 52. Tang A, Cloutier G, Szeverenyi NM, et al. Ultrasound Elastography and MR  
41 Elastography for Assessing Liver Fibrosis: Part 1, Principles and Techniques. *Am J*  
42 *Roentgenol*. 2015;205(1):22.  
43  
44 53. Carlsen JF, Pedersen MR, Ewertsen C, et al. A comparative study of strain and shear-  
45 wave elastography in an elasticity phantom. *Am J Roentgenol*. 2015;204(3):W236-242.  
46  
47 54. Tozaki M, Saito M, Joo C, et al.. Ultrasonographic tissue quantification of the breast  
48 using acoustic radiation force impulse technology: phantom study and clinical  
49 application. *Jpn J Radiol*. 2011;29(8):598-603.  
50  
51 55. Ling W, Lu Q, Quan J, et al.. Assessment of impact factors on shear wave based liver  
52 stiffness measurement. *Eur J Radiol*. 2013;82(2):335-41.  
53  
54 56. Grenier N, Gennisson J-L, Cornelis F, et al. Renal ultrasound elastography. *Diagn Interv*  
55  
56  
57  
58  
59  
60

1  
2  
3        *Imaging*. 2013;94(5):545-50.  
4

- 5 57. Quarello E, Lacoste R, Mancini J, et al. ShearWave elastography of fetal lungs in  
6 pregnant baboons. *Diagn Interv Imaging*. 2016;97(6):605-10.  
7  
8  
9  
10  
11  
12  
13  
14  
15  
16  
17  
18  
19  
20  
21  
22  
23  
24  
25  
26  
27  
28  
29  
30  
31  
32  
33  
34  
35  
36  
37  
38  
39  
40  
41  
42  
43  
44  
45  
46  
47  
48  
49  
50  
51  
52  
53  
54  
55  
56  
57  
58  
59  
60

For peer review only

1  
2  
3 **Figure 1:** Elastogram on fetal thorax centered on a 4-chamber view of the fetal heart, using  
4 an abdominal convex probe 1-6 MHz (C1-6-D probe). Elasticity appears color-coded: blue  
5 identifies deformable tissue and red indicates rigid tissues (kPa).  
6  
7

8  
9 **Figure 2:** Design of the study.  
10

11  
12 **Figure 3:** Measurement sites with 2D comb-push SWE using an abdominal convex probe 1-6  
13 MHz (C1-6-D probe). Color scale ranging from 0 to 48 kPa. Sufficient color maps covering  
14 more than 50% of the sampling area are obtained considered as a technical success. Regions  
15 of interest (ROI) are placed on homogeneous elastograms: 3 measurements on the proximal  
16 lung (anterior “P1”, medium “P2” and posterior portion “P3”), 3 measurements on the distal  
17 lung (anterior “D1”, medium “D2” and posterior portion “D3”) and 3 measurements on 3  
18 liver segments (IV, V, VI). Operator will perform 2 cycles of 9 Young’s modulus  
19 measurements while systematically repositioning the probe and each target ROI.  
20  
21  
22  
23  
24  
25  
26

27 **Figure 4:** 2D comb-push SWE on proximal fetal lung. Color scale ranging from 0 to 48 kPa.  
28 On image (a), elastogram is not homogeneous and is degraded by artifact on the left side due  
29 to rib shadowing. By moving the probe to another location, a more homogeneous elastogram  
30 (b) is obtained allowing measurement.  
31  
32  
33  
34  
35  
36  
37  
38  
39  
40  
41  
42  
43  
44  
45  
46  
47  
48  
49  
50  
51  
52  
53  
54  
55  
56  
57  
58  
59  
60

1  
2  
3  
4  
5  
6  
7  
8  
9  
10  
11  
12  
13  
14  
15  
16  
17  
18  
19  
20  
21  
22  
23  
24  
25  
26  
27  
28  
29  
30  
31  
32  
33  
34  
35  
36  
37  
38  
39  
40  
41  
42  
43  
44  
45  
46  
47  
48  
49  
50  
51  
52  
53  
54  
55  
56  
57  
58  
59  
60

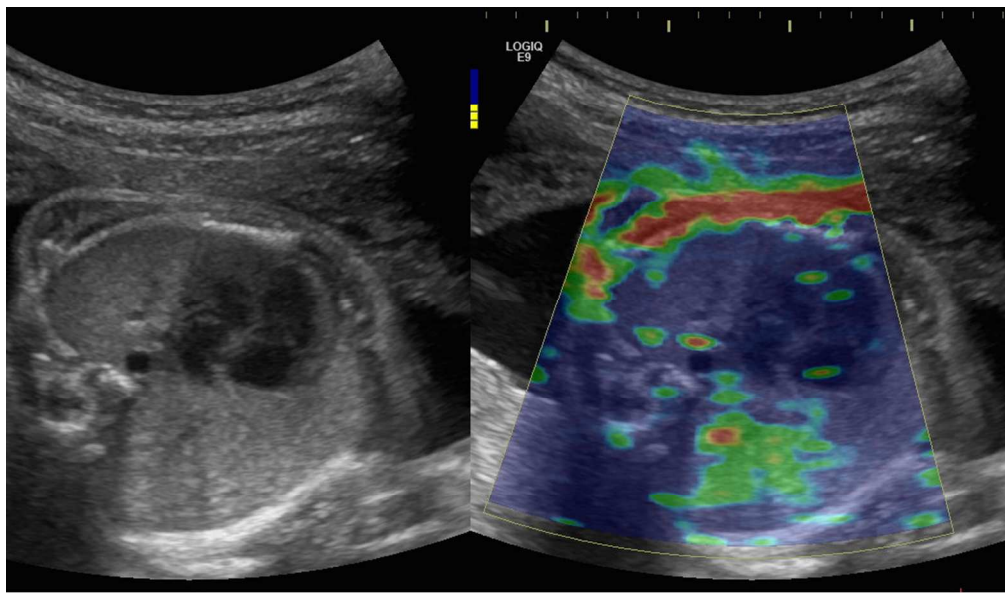

Elastogram on fetal thorax centered on a 4-chamber view of the fetal heart, using an abdominal convex probe 1-6 MHz (C1-6-D probe). Elasticity appears color-coded: blue identifies deformable tissue and red indicates rigid tissues (kPa).

88x51mm (300 x 300 DPI)

Review only

1  
2  
3  
4  
5  
6  
7  
8  
9  
10  
11  
12  
13  
14  
15  
16  
17  
18  
19  
20  
21  
22  
23  
24  
25  
26  
27  
28  
29  
30  
31  
32  
33  
34  
35  
36  
37  
38  
39  
40  
41  
42  
43  
44  
45  
46  
47  
48  
49  
50  
51  
52  
53  
54  
55  
56  
57  
58  
59  
60

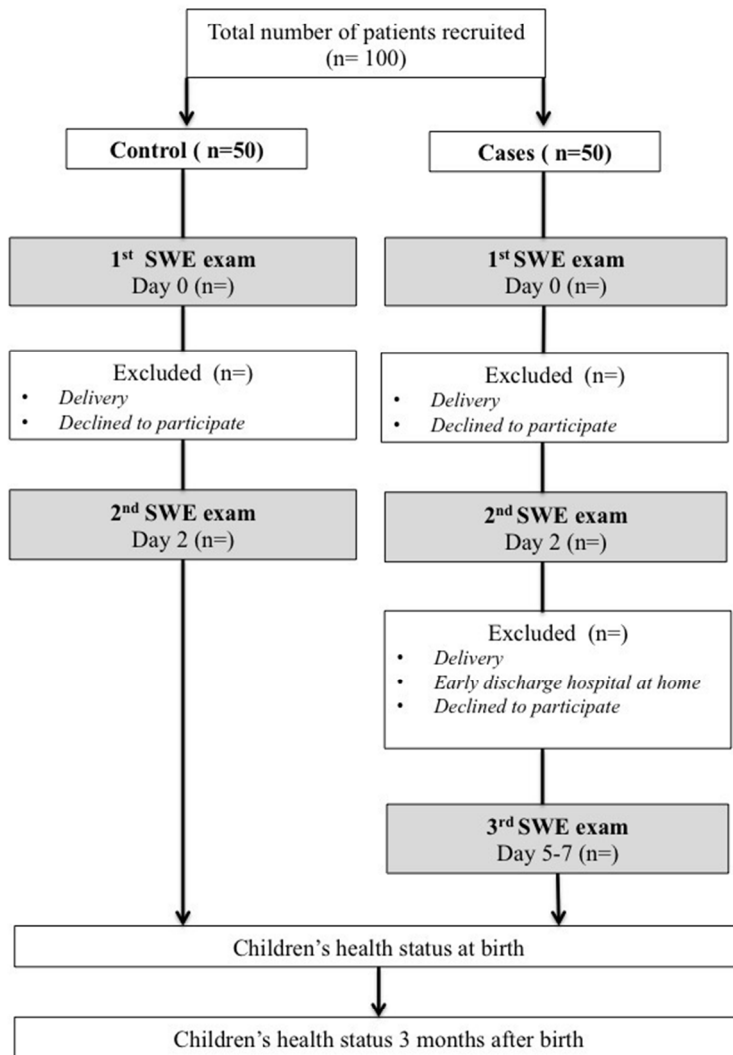

Design of the study.

60x81mm (300 x 300 DPI)

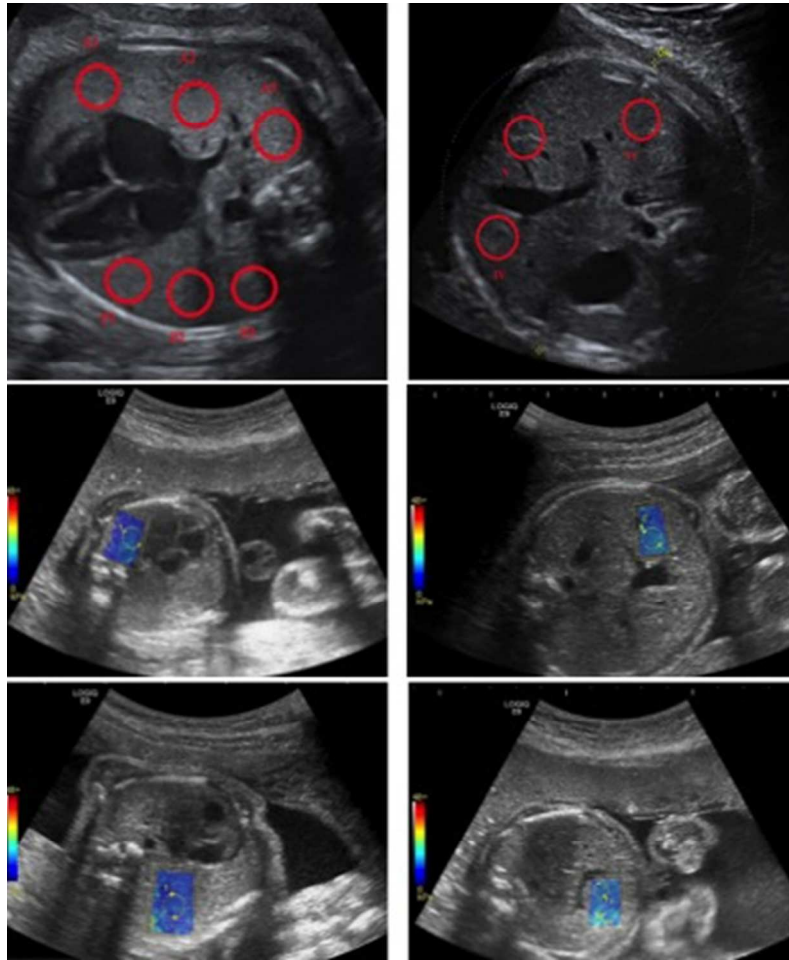

Measurement sites with 2D comb-push SWE using an abdominal convex probe 1-6 MHz (C1-6-D probe). Color scale ranging from 0 to 48 kPa. Sufficient color maps covering more than 50% of the sampling area are obtained considered as a technical success. Regions of interest (ROI) are placed on homogeneous elastograms: 3 measurements on the proximal lung (anterior "P1", medium "P2" and posterior portion "P3"), 3 measurements on the distal lung (anterior "D1", medium "D2" and posterior portion "D3") and 3 measurements on 3 liver segments (IV, V, VI). Operator will perform 2 cycles of 9 Young's modulus measurements while systematically repositioning the probe and each target ROI.

33x40mm (300 x 300 DPI)





2D comb-push SWE on proximal fetal lung. Color scale ranging from 0 to 48 kPa. On image (a), elastogram is not homogeneous and is degraded by artifact on the left side due to rib shadowing. By moving the probe to another location, a more homogeneous elastogram (b) is obtained allowing measurement.

31x43mm (300 x 300 DPI)



STROBE 2007 (v4) Statement—Checklist of items that should be included in reports of *case-control studies*

| Section/Topic             | Item # | Recommendation                                                                                                                                                                       | Reported on page # |
|---------------------------|--------|--------------------------------------------------------------------------------------------------------------------------------------------------------------------------------------|--------------------|
| Title and abstract        | 1      | (a) Indicate the study’s design with a commonly used term in the title or the abstract                                                                                               | 3                  |
|                           |        | (b) Provide in the abstract an informative and balanced summary of what was done and what was found                                                                                  | 3                  |
| <b>Introduction</b>       |        |                                                                                                                                                                                      |                    |
| Background/rationale      | 2      | Explain the scientific background and rationale for the investigation being reported                                                                                                 | 4                  |
| Objectives                | 3      | State specific objectives, including any prespecified hypotheses                                                                                                                     | 5,6                |
| <b>Methods</b>            |        |                                                                                                                                                                                      |                    |
| Study design              | 4      | Present key elements of study design early in the paper                                                                                                                              | 8                  |
| Setting                   | 5      | Describe the setting, locations, and relevant dates, including periods of recruitment, exposure, follow-up, and data collection                                                      | 8                  |
| Participants              | 6      | (a) Give the eligibility criteria, and the sources and methods of case ascertainment and control selection. Give the rationale for the choice of cases and controls                  | 8,9                |
|                           |        | (b) For matched studies, give matching criteria and the number of controls per case                                                                                                  |                    |
| Variables                 | 7      | Clearly define all outcomes, exposures, predictors, potential confounders, and effect modifiers. Give diagnostic criteria, if applicable                                             | 9,10               |
| Data sources/ measurement | 8*     | For each variable of interest, give sources of data and details of methods of assessment (measurement). Describe comparability of assessment methods if there is more than one group | 9,10,11            |
| Bias                      | 9      | Describe any efforts to address potential sources of bias                                                                                                                            | 11                 |
| Study size                | 10     | Explain how the study size was arrived at                                                                                                                                            | 11                 |
| Quantitative variables    | 11     | Explain how quantitative variables were handled in the analyses. If applicable, describe which groupings were chosen and why                                                         | 11,12              |
| Statistical methods       | 12     | (a) Describe all statistical methods, including those used to control for confounding                                                                                                | 12                 |
|                           |        | (b) Describe any methods used to examine subgroups and interactions                                                                                                                  | 12                 |
|                           |        | (c) Explain how missing data were addressed                                                                                                                                          | 12                 |
|                           |        | (d) If applicable, explain how matching of cases and controls was addressed                                                                                                          | 12                 |
|                           |        | (e) Describe any sensitivity analyses                                                                                                                                                | 12                 |
| <b>Results</b>            |        |                                                                                                                                                                                      | 12                 |

1  
2  
3  
4  
5  
6  
7  
8  
9  
10  
11  
12  
13  
14  
15  
16  
17  
18  
19  
20  
21  
22  
23  
24  
25  
26  
27  
28  
29  
30  
31  
32  
33  
34  
35  
36  
37  
38  
39  
40  
41  
42  
43  
44  
45  
46  
47  
48  
49

|                          |     |                                                                                                                                                                                                              |     |
|--------------------------|-----|--------------------------------------------------------------------------------------------------------------------------------------------------------------------------------------------------------------|-----|
| Participants             | 13* | (a) Report numbers of individuals at each stage of study—eg numbers potentially eligible, examined for eligibility, confirmed eligible, included in the study, completing follow-up, and analysed            | 8,9 |
|                          |     | (b) Give reasons for non-participation at each stage                                                                                                                                                         | 10  |
|                          |     | (c) Consider use of a flow diagram                                                                                                                                                                           | 10  |
| Descriptive data         | 14* | (a) Give characteristics of study participants (eg demographic, clinical, social) and information on exposures and potential confounders                                                                     | 8,9 |
|                          |     | (b) Indicate number of participants with missing data for each variable of interest                                                                                                                          |     |
| Outcome data             | 15* | Report numbers in each exposure category, or summary measures of exposure                                                                                                                                    |     |
| Main results             | 16  | (a) Give unadjusted estimates and, if applicable, confounder-adjusted estimates and their precision (eg, 95% confidence interval). Make clear which confounders were adjusted for and why they were included |     |
|                          |     | (b) Report category boundaries when continuous variables were categorized                                                                                                                                    |     |
|                          |     | (c) If relevant, consider translating estimates of relative risk into absolute risk for a meaningful time period                                                                                             |     |
| Other analyses           | 17  | Report other analyses done—eg analyses of subgroups and interactions, and sensitivity analyses                                                                                                               |     |
| <b>Discussion</b>        |     |                                                                                                                                                                                                              |     |
| Key results              | 18  | Summarise key results with reference to study objectives                                                                                                                                                     | 13  |
| Limitations              | 19  | Discuss limitations of the study, taking into account sources of potential bias or imprecision. Discuss both direction and magnitude of any potential bias                                                   | 15  |
| Interpretation           | 20  | Give a cautious overall interpretation of results considering objectives, limitations, multiplicity of analyses, results from similar studies, and other relevant evidence                                   | 14  |
| Generalisability         | 21  | Discuss the generalisability (external validity) of the study results                                                                                                                                        | 14  |
| <b>Other information</b> |     |                                                                                                                                                                                                              |     |
| Funding                  | 22  | Give the source of funding and the role of the funders for the present study and, if applicable, for the original study on which the present article is based                                                | 2   |

\*Give information separately for cases and controls in case-control studies and, if applicable, for exposed and unexposed groups in cohort and cross-sectional studies.

**Note:** An Explanation and Elaboration article discusses each checklist item and gives methodological background and published examples of transparent reporting. The STROBE checklist is best used in conjunction with this article (freely available on the Web sites of PLoS Medicine at <http://www.plosmedicine.org/>, Annals of Internal Medicine at <http://www.annals.org/>, and Epidemiology at <http://www.epidem.com/>). Information on the STROBE Initiative is available at [www.strobe-statement.org](http://www.strobe-statement.org).

# BMJ Open

## Feasibility of 2-D ultrasound shear wave elastography of fetal lungs in case of threatened preterm labor: a study protocol



|                                 |                                                                                                                                                                                                                                                                                                                                                                                                                                                                                                                                                                                                                                                                                                                                                                                                                                                                                                                                                                                                                                                                                                                                                                    |
|---------------------------------|--------------------------------------------------------------------------------------------------------------------------------------------------------------------------------------------------------------------------------------------------------------------------------------------------------------------------------------------------------------------------------------------------------------------------------------------------------------------------------------------------------------------------------------------------------------------------------------------------------------------------------------------------------------------------------------------------------------------------------------------------------------------------------------------------------------------------------------------------------------------------------------------------------------------------------------------------------------------------------------------------------------------------------------------------------------------------------------------------------------------------------------------------------------------|
| Journal:                        | <i>BMJ Open</i>                                                                                                                                                                                                                                                                                                                                                                                                                                                                                                                                                                                                                                                                                                                                                                                                                                                                                                                                                                                                                                                                                                                                                    |
| Manuscript ID                   | bmjopen-2017-018130.R2                                                                                                                                                                                                                                                                                                                                                                                                                                                                                                                                                                                                                                                                                                                                                                                                                                                                                                                                                                                                                                                                                                                                             |
| Article Type:                   | Protocol                                                                                                                                                                                                                                                                                                                                                                                                                                                                                                                                                                                                                                                                                                                                                                                                                                                                                                                                                                                                                                                                                                                                                           |
| Date Submitted by the Author:   | 21-Sep-2017                                                                                                                                                                                                                                                                                                                                                                                                                                                                                                                                                                                                                                                                                                                                                                                                                                                                                                                                                                                                                                                                                                                                                        |
| Complete List of Authors:       | <p>MOTTET, Nicolas; University Hospital of Besançon, Department of Obstetrics and Gynecology ; Nanomedecine Laboratory, INSERM EA4662, University of Franche-Comte</p> <p>Aubry, Sébastien ; University Hospital of Besançon, Department of Radiology; University of Franche-Comte, Nanomedecine laboratory, INSERM EA4662</p> <p>Vidal, Chrystelle; University Hospital of Besançon, Centre d'investigation Clinique-Innovation Technologique 1431, INSERM</p> <p>Boiteux, Guillaume; University Hospital of Besançon, Centre d'investigation Clinique-Innovation Technologique 1431, INSERM</p> <p>Metz, Jean-Patrick; University Hospital of Besançon, Department of Obstetrics and Gynecology</p> <p>Riethmuller, Didier ; University Hospital of Besançon, Department of Obstetrics and Gynecology</p> <p>Pazart, Lionel; University Hospital of Besançon, Inserm Centre Investigation Clinique-Innovation Technologique 1431, INSERM; Inserm, CIC1431</p> <p>Ramanah, Rajeev; University Hospital of Besançon; University of Franche-Comte, Department of Obstetrics and Gynecology; Nanomedecine Laboratory, INSERM EA4662, University of Franche-Comte</p> |
| <b>Primary Subject Heading</b>: | Radiology and imaging                                                                                                                                                                                                                                                                                                                                                                                                                                                                                                                                                                                                                                                                                                                                                                                                                                                                                                                                                                                                                                                                                                                                              |
| Secondary Subject Heading:      | Obstetrics and gynaecology, Paediatrics                                                                                                                                                                                                                                                                                                                                                                                                                                                                                                                                                                                                                                                                                                                                                                                                                                                                                                                                                                                                                                                                                                                            |
| Keywords:                       | shear wave elastography, lung, fetal, elasticity                                                                                                                                                                                                                                                                                                                                                                                                                                                                                                                                                                                                                                                                                                                                                                                                                                                                                                                                                                                                                                                                                                                   |
|                                 |                                                                                                                                                                                                                                                                                                                                                                                                                                                                                                                                                                                                                                                                                                                                                                                                                                                                                                                                                                                                                                                                                                                                                                    |

SCHOLARONE™  
Manuscripts

1  
2  
3 **Feasibility of 2-D ultrasound shear wave elastography of fetal lungs in case of**  
4 **threatened preterm labor: a study protocol**  
5  
6  
7

8 Nicolas Mottet <sup>1,2</sup>, Sébastien Aubry <sup>2,3</sup>, Chrystelle Vidal <sup>4</sup>, Guillaume Boiteux <sup>4</sup>, Jean-Patrick  
9 Metz <sup>1</sup>, Didier Riethmuller <sup>1</sup>, Lionel Pazart <sup>4</sup>, Rajeev Ramanah <sup>1,2</sup>  
10

11  
12 <sup>1</sup> Pôle Mère-Femme, department of Obstetrics and Gynecology, University Hospital of  
13 Besançon; University of Franche-Comte, 25000 Besançon, France  
14

15 <sup>2</sup> Nanomedecine Laboratory, INSERM EA4662, University of Franche-Comte, 25000,  
16 Besançon, France.  
17

18 <sup>3</sup> Department of Musculoskeletal Imaging, University Hospital of Besançon, 25000 Besançon,  
19 France  
20

21 <sup>4</sup> Centre d'investigation Clinique-Innovation Technologique 1431, INSERM, University  
22 Hospital of Besançon, France.  
23  
24

25  
26  
27 Correspondence to:

28  
29 Nicolas MOTTET

30  
31 University Hospital of Besançon, Department of Obstetrics and Gynecology

32  
33 Alexander Fleming Boulevard

34  
35 25000 Besançon, France  
36

37  
38 Telephone number +33 381 21 88 95

39  
40 Fax number +33 381 21 86 13

41  
42 Email: [nemottet@gmail.com](mailto:nemottet@gmail.com)  
43  
44  
45  
46  
47  
48  
49  
50  
51  
52  
53  
54  
55  
56  
57  
58  
59  
60

1  
2  
3 **Contributors** : All the authors contributed to the conception and design of the study. NM,  
4 SA, and RR provided the idea for the research or article, created the hypothesis and wrote the  
5 original proposal. NM, CV, LP and RR significantly contributed to writing the paper. NM,  
6 CV, GB and LP wrote this protocol paper. All authors read and approved the final manuscript.  
7  
8  
9

10 **Funding:** This study is supported by University Hospital of Besançon, APICHU Réf:  
11 API/2015/60  
12

13  
14 **Competing interests** None declared.  
15

16  
17 Patient consent obtained.  
18  
19

20 **Ethics approval** The Human Research Ethics Committee (Comité de Protection des  
21 Personnes EST II, process number **15/494**)  
22  
23  
24  
25  
26  
27  
28  
29  
30  
31  
32  
33  
34  
35  
36  
37  
38  
39  
40  
41  
42  
43  
44  
45  
46  
47  
48  
49  
50  
51  
52  
53  
54  
55  
56  
57  
58  
59  
60

## ABSTRACT

### Introduction

2-D ultrasound Shear Wave Elastography (SWE) could be considered as a new noninvasive tool for monitoring fetal lung development based on evaluation of mechanical properties during pregnancy. Interesting results are available concerning use of SWE on developing organs, especially on premature infants and animals models. The main objective in this study is to evaluate feasibility of 2-D SWE in human fetal lungs between 24 and 34 weeks of gestation (WG). Secondary objective is to modelize fetal lung-to-liver elastography ratio (LLE ratio) and to assess variations between normal lung and lung surfactant-enriched after a corticosteroids course indicated for a threatened preterm labor (TPL).

### Methods and analysis

A prospective case-control study will be performed between 24 and 34 WG. Fetal lungs and liver will be explored by SWE into two groups: fetuses of women with an uncomplicated pregnancy (control group) and fetuses of women with a TPL requiring administration of corticosteroids (cases group). LLE Ratio will be defined as the value of the lung elasticity divided by the value of the liver elasticity.

Primary judgment criterion is the value of elasticity modulus expressed in kilopascal. Lungs and liver will be explored through three measurements to define the most reproducible regions with the lowest intra and inter-observer variability. Feasibility will be evaluated by assessing the number of exams performed and the number of exams with interpretable results. Intra and inter-observer reproducibility will be evaluated by means of the intra-class correlation coefficient.

### Ethics and dissemination

Approval of the study protocol was obtained from the human ethical research committee (Comité de Protection des Personnes EST II, process number 15/494) and the French National Agency for Medicines and Health Products Safety (process number 2015-A01575-44). All participants will sign a statement of informed consent.

**Trial Registration number:** NCT02870608

**Key words:** Shear wave elastography, elasticity, fetal, lung.

### Strengths and limitation of the study

- This study will be the first one to demonstrate applicability of Shear Wave Elastography in human fetal lungs.
- Pharmacovigilance data will be collected at birth and 3 months later in order to assess safety of the device.
- Different factors will be taken into account to understand variability of measures: acquisition depth, number of measurements and representative values such as median or mean values.
- We shall not attempt to define reference value of fetal lung elasticity or to correlate SWE value with respiratory function at birth.

## INTRODUCTION:

### Background

Prenatal evaluation of fetal lung maturity (FLM) is still a challenge and different approaches have been reported with invasive biological tools or fetal imaging including ultrasounds and magnetic resonance imaging (MRI). FLM is mainly correlated with surfactant level and numerous tests have been developed to quantify this production: lecithin/sphingomyelin ratio (L/S), lamellar body count, testing for Phosphatidyl glycerol with thin-layer chromatography, and estimation of the surfactant/albumin ratio using polarized light. All of these tests have been shown to have good sensitivity and negative predictive values; however, they all have a low positive predictive value and need invasive procedure<sup>1,2</sup>. Thus, amniocentesis for FLM became obsolete<sup>3</sup>.

Lung and liver signal or echogenicity were often compared as ratio to assess FLM in several studies<sup>4-10</sup>. Non-invasive assessment of FLM has been first attempted using ultrasonography quantified by gray level histogram<sup>4,11,12</sup>. These studies demonstrated sonographic changes associated with lung maturation but weak correlations between echogenicity and respiratory distress syndrome (RDS). Quantitative analysis with specific software has been secondly proposed to improve robustness. Fetal lung texture analysis with this method demonstrated a strong correlation with gestational age, biological test on amniotic fluid and risk of neonatal respiratory morbidity<sup>13, 14</sup>. Additionally, several studies found a significant association between fetal lung-to-liver signal intensity ratio and estimated gestational age with fetal Magnetic Resonance Imaging (MRI). Actually, this technique is mainly used to assess fetal lung development and volume, especially in case of congenital diaphragmatic hernia or severe oligohydramnios. Nevertheless, the accuracy of both MRI and ultrasounds for estimating long-term respiratory outcomes remains limited<sup>15-19</sup>. These previous techniques propose prenatal evaluation of lung maturity based on imaging features, but prediction of the pulmonary function through prenatal biomechanical properties seems relevant. With this hypothesis, we advanced the concept of “prenatal functional imaging” and shear wave elastography (SWE) could be a promising tool.

SWE is a recent ultrasound technology using acoustic radiation force imaging (ARFI), which enables to assess the stiffness of tissues in real time through a color quantitative elastogram<sup>20</sup>. SWE assesses tissue elasticity (E), which is the tendency of tissue to resist deformation with an applied force. In locally homogeneous and purely elastic medium, we



1  
2  
3 can calculate Young's modulus (kPa) from the shear wave speed ( $\text{m}\cdot\text{s}^{-1}$ ) with the formula:  $E=$   
4  $3\rho\cdot c_{\text{sw}}^2$  ( $\rho$  being the medium density and  $c_{\text{sw}}$  the shear wave speed). The stiffness at any  
5 location of the ROI can be sampled using measurement tools to obtain a quantitative  
6 evaluation either in terms of shear wave speed or Young's modulus. A low shear wave speed  
7 corresponds to a soft tissue, while a shear wave high speed indicates a stiff tissue. Study of  
8 deep organs is possible with SWE because this method does not require any compression-  
9 relaxation sequence on the target organ. One of the advantages of SWE over other  
10 elastography methods is that the generation of the mechanical impulse is operator-  
11 independent. SWE is expanding its range nowadays by its promising role for examination of  
12 various organs (liver, thyroid) and for aiding discrimination of lesion characteristic, especially  
13 breast or prostate tumors<sup>21-24</sup>.

22 There is to date no publication regarding its use on human fetuses. The Food and Drug  
23 Administration (FDA) has so far, not yet approved use of SWE for obstetric clinical  
24 applications because of the paucity of data in the literature. Although there is no report about  
25 apparent histological changes with shear wave, the absence of others bioeffects could not be  
26 discarded and further studies are recommended<sup>25</sup>. However, setting parameters respect  
27 mechanical and thermal indexes for soft-tissues and bone, which are necessary to allow an  
28 obstetric examination defined by the FDA<sup>26</sup>. Thus, there is a debate concerning safety of SWE  
29 in fetal medicine. Herman et al studied the models and regulatory considerations for transient  
30 temperature rise during ARFI, and found that any transient increase in temperature caused by  
31 pulse bursts might still be within the safe limits determined by the (FDA)<sup>27</sup>. Others authors  
32 showed that transducer heating was below  $1^{\circ}\text{C}$  for the current clinical applications of ARFI.  
33 According to experimental studies that simulate the heating of soft tissue during ARFI, they  
34 demonstrate that ARFI on soft tissue is safe, provided that thermal index must be monitored  
35  
36  
37  
38  
39  
40  
41  
42  
43  
44  
45  
46  
47  
48  
49  
50  
51  
52  
53  
54  
55  
56  
57  
58  
59  
60

22 Interesting and reassuring results are available concerning use of SWE on developing  
23 organs, especially on premature infants and animals models. Principals organs explored are  
24 the liver, brain and lungs. Quarello et al demonstrated the possibility to use SWE in non-  
25 human primate fetuses and its feasibility to explore fetal organs. They found that elasticity  
26 values were related to organs and gestational age<sup>30</sup>. Concerning fetal lungs elasticity,  
27 measurements of the proximal lungs seem to increase throughout the pregnancy. Concerning  
28 use of SWE on premature infants, results are more numerous and include exploration of the  
29 liver or the brain. Alison et al. have demonstrated feasibility and reproducibility of liver

1  
2  
3 stiffness in preterm neonates with intra uterine growth restriction (IUGR) and gestational age  
4 at birth between 26-31 weeks of gestation (WG)<sup>31</sup>. Others studies reported contribution of  
5 SWE to the diagnosis of biliary atresia in neonates<sup>32,33</sup>. Kim et al described variation of brain  
6 elasticity in different regions in healthy neonates born between 28 and 40 WG<sup>34</sup>. Su et al  
7 quantitatively evaluated the effect of acoustic radiation force impulse imaging (ARFI) in  
8 neonatal brain development. The authors found that full-term neonates had significantly  
9 higher elasticity values than preterm neonates and there were no reported immediate adverse  
10 events<sup>35</sup>. Others teams work on application of this technology to neonates as a supplementary  
11 tool to detect early ischemic brain injury<sup>36</sup>.

12  
13  
14  
15  
16  
17  
18 If we describe fetal thorax centered on a 4-chamber view of the fetal heart with SWE,  
19 the following observations can be made (figure 1):  
20

- 21  
22  
23 - SWE is able to make distinction between fetal soft and stiff tissues. Fetal ribs  
24 appear red colored mapped whereas proximal lung appears blue colored.  
25  
26 - A homogeneous colored area can be obtained on the proximal lung with a  
27 color scale ranging from 0 to 48 kPa. A homogeneous ROI is important for  
28 the reliability of the results.  
29  
30 - SWE can differ according to the acquisition depth. Proximal lung appears  
31 with a blue homogenous distribution whereas distal lung appears with green  
32 homogenous distribution.  
33  
34  
35  
36  
37

## 38 Objectives

39  
40 The main objective in this study is to evaluate feasibility of 2-D SWE in human fetal  
41 lungs between 24 and 34 weeks of gestation (WG). Secondary objective is to modelize fetal  
42 lung-to-liver elastography ratio (LLE ratio) and to assess variations between normal lung and  
43 lung surfactant-enriched after a corticosteroids course indicated for a threatened preterm labor  
44 (TPL).  
45  
46  
47  
48  
49  
50  
51  
52  
53  
54  
55  
56  
57  
58  
59  
60

## METHODS/DESIGN

### Study design and setting

A prospective case-control study will be performed at the University Hospital of Besançon, (Besançon, France), Department of Obstetrics and Gynecology. Fetal lungs and liver will be explored by SWE between 24 and 34 WG in two groups: fetuses of women with an uncomplicated pregnancy will be considered as control group, and fetuses of women with a threatened preterm labor requiring administration of corticosteroids will be enrolled as cases. The first eligible patient was enrolled in May 2016 and we plan to enroll for 18 months. End of follow up of children will be completed approximately six months after the last birth.

In this pilot study, corticosteroids generate an effect model interesting for assessment of LLE ratio variation in the cases. We take advantage of the action of corticosteroids to explore another medium with different supposed biomechanical properties. Indeed, corticosteroids accelerated development of type 2 pneumocytes leading to surfactant production. Similarly, there is a significant increase in saturated phosphatidylcholine content in fetal lung, modifying propagation of shear waves potentially<sup>37</sup>.

Control group will be recruited during routine prenatal visits or ultrasounds according to the French ultrasounds schedule (ultrasound screening during the second trimester between 20-25 WG and the third trimester between 30-35 WG<sup>38</sup>. Cases will be enrolled during their hospitalization for threatened preterm delivery (figure 2). The design, conduction and reporting of this study will follow the norms of the Strengthening the Reporting of Observational Studies in Epidemiology (STROBE) statement<sup>39</sup>.

### Ethical considerations

The study respects the ethical standards established in the declaration of Helsinki<sup>40</sup>. Investigators undertake to respect law no. 2004-806 of August 9, 2004 relative to public health policy on clinical trials, made effective by implementing Decree 2006-477 of April 26, 2006<sup>41</sup>. Approval of the study protocol was obtained from the human ethical research committee (Comité de Protection des Personnes EST II, process number **15/494**) and the French National Agency for Medicines and Health Products Safety (process number **2015-A01575-44**). The study is registered on clinicaltrial.gov with the following number: **NCT02870608**. All participants will sign a statement of informed consent and will be allowed to abandon the study at any time, with no negative consequences. All procedures of the study

1  
2  
3 will be confidential. The study will involve collection and storage of ultrasound images and  
4 study participants will therefore be thoroughly informed. All variables (patient parameters,  
5 data items, data elements) will be aggregated into electronic Case report Forms.  
6  
7

8 As explained in the background, The Food and Drug Administration (FDA) has so far,  
9 not yet approved use of SWE for obstetric clinical applications because of the paucity of data  
10 in the literature. In this study, fetuses will be included from 24 to 34 WG, over the period of  
11 organogenesis. In the patient information sheet, it is specified that previous studies explored  
12 liver or brain of premature infants with SWE. Alison et al. studied liver stiffness in preterm  
13 neonates with intra uterine growth restriction (IUGR) and gestational age at birth between 26-  
14 31 WG<sup>31</sup>. Franchi-Abella et al evaluate feasibility and diagnostic accuracy of SWE for the  
15 assessment of liver stiffness in 96 patients and 7 were preterm newborns between 30-35 WG  
16<sup>42</sup>. Both studies did not report adverse outcomes and were approved by institutional review  
17 board. Moreover, consent form mentions conclusions of an experimental study of the  
18 biological effects associated with SWE in brains of neonatal mice. Results indicated that  
19 using SWE do not cause detectable histologic changes. Potential effects on intracellular  
20 signaling pathways were detected when the SWE scanning lasted more than 30 min<sup>25</sup>. Thus,  
21 patients will be informed that our study is focused on fetuses with a gestational age similar to  
22 preterm newborn included in the above-mentioned studies. Moreover, exploration with SWE  
23 will concern only lung and liver with duration of less than 10 min in respect of biophysical  
24 safety indexes: Thermal index  $Ti \leq 0.7$  and Mechanical index  $Mi < 1,9$ .  
25  
26  
27  
28  
29  
30  
31  
32  
33  
34  
35  
36  
37

### 38 **Participants**

39  
40 Cases will be recruited during hospitalization for a threatened preterm labor requiring  
41 administration of corticosteroids. The complementary inclusion criteria are: pregnant women  
42 aged 18 years or more, singleton pregnancy with eutrophic fetus, signature of consent and  
43 affiliation to health insurance scheme (figure 2). Patients will be stratified by gestational age  
44 between 24 and 34 WG, with one class every WG (10 classes in total) and 5 patients per class.  
45 After obtaining consent, a SWE exam will be performed before the first intramuscular  
46 administration of corticosteroids “day 0” (betamethasone 12mg). A second SWE exam will be  
47 performed within 24 h after the second intramuscular administration of corticosteroids “day  
48 2”. A third SWE will be performed between the fifth and the seventh day following the first  
49 administration of corticosteroids “day 5-7”, if the women are not early discharge at home.  
50  
51  
52  
53  
54  
55  
56  
57  
58  
59  
60

1  
2  
3 For the control group, women will be matched by gestational age and will be recruited  
4 during their pregnancy monitoring. Information concerning the study will be given as early as  
5 the second trimester by obstetrician or midwives during medical visits or ultrasounds. The  
6 complementary inclusion criteria are following: major pregnant women, uncomplicated  
7 pregnancy between 24 and 34 WG, singleton pregnancy with eutrophic fetus, signature of  
8 consent and affiliation to health insurance scheme. If they are willing to participate, a first  
9 SWE exam will be proposed at “day 0”, followed by a second one in two days “day 2”.  
10 Patients who come back for an SWE exam performed outside current medical visit will  
11 receive financial compensation for travel expenses. As well as cases, control patients will be  
12 stratified by gestational age between 24 and 34 WG.

13  
14  
15  
16  
17  
18  
19  
20 Exclusion criteria common to both groups are: Fetal lung or liver pathologies,  
21 inclusion in another medical study, patients under legal incapacity.

## 22 23 24 **Variables and measuring technique**

- 25 • **Prenatal variables**

26  
27  
28  
29  
30 Primary judgment criterion is the value of Young’s modulus (E) (elasticity modulus)  
31 expressed in kilopascal (kPa). A Logic E9 system (General Electric Medical System,  
32 Milwaukee, WI, USA) with CE certification CE LNE/G-MED [CE0459] will be used for this  
33 study, equipped with abdominal convex probe 1-6 MHz (C1-6-D probe). This technique  
34 includes a real-time visualization of a color quantitative elastogram coupled to a B-mode  
35 image. To provide robust shear wave and optimize its detection, Logiq E9 uses innovative  
36 techniques. Comb-push Ultrasound SWE generates multiple shear wave sources into the  
37 region of interest (ROI) and uses directional filtering to remove the interference. The TAST  
38 technique is able to robustly track shear waves and correct for the sequential tracking delay<sup>43</sup>.  
39 This technique has the merit of rapid and solid reconstruction of a large elasticity map  
40 (elastogram) with the only single acquisition by generating multiple shear waves from  
41 multiple unfocused push beams.

42  
43  
44  
45  
46  
47  
48  
49  
50 The shear wave acquisition measurement protocol is saved in a specific preset that will be  
51 used for every patient: 2D-Mode: Harmonic imaging central depth = 6 cm, frequency = 6  
52 MHz, Acoustic Power 100%; Elastography-Mode: Shear wave signal frequency ranges from  
53 50 to 400 kHz, Acoustic power of the pushing beam: 100%, Tracking power: 100%, color  
54 scale ranging from 0 to 48 kPa. Biophysical safety indices: Thermal index  $T_i \leq 0.7$  and  
55  
56  
57  
58  
59  
60

1  
2  
3 Mechanical index  $M_i < 1,9$  (table 1).  
4

5 Fetal lungs will be voluntarily approached laterally to systematically obtain proximal  
6 and distal lungs regarding the distance to the probe. Each measurement has to be performed  
7 on a homogeneous elastogram to be valid. Operators will perform 2 cycles of 9 Young's  
8 modulus measurements while systematically repositioning the probe on each target organ.  
9

10 A cycle includes: 3 measurements on the proximal lung (anterior "P1", medium "P2" and  
11 posterior portion "P3"), 3 measurements on the distal lung (anterior "D1", medium "D2" and  
12 posterior portion "D3") and 3 measurements on 3 liver segments (IV, V, VI) (figure 3).  
13 Implementation of Shear Wave elastography displays 2D images of Young's Modulus in the  
14 target organ. In real time, the elasticity appears color coded, where blue identifies deformable  
15 tissue and red indicates rigid tissues. The Young's modulus value at any location will be  
16 sampled using a round ROI of 5 mm. Distance between the probe and the target organ will be  
17 collected. The average elasticity in the ROI will be automatically recorded by the system in a  
18 worksheet. The investigators will adjust the position of the ROI using the B-mode image for  
19 guidance and take care to obtain the most homogeneous color coded ROI before Young's  
20 modulus estimation (figure 4). Technical failure was defined as failure to obtain a  
21 homogeneous elastogram in more than 50% in the sampling area. To test the inter-observer  
22 variability, a second observer will successively perform measurements on 30 fetuses. All  
23 measurements will be carried out directly by ultrasound on the target organ. The second  
24 observer will perform measurements just after the first one and will be blinded to the  
25 feasibility and results obtained by the first one.  
26  
27

28 Estimation of Fetal Weight Estimation (EFW) will be performed during each exam  
29 according to Hadlock formula based on Cephalic circumference (CC), Abdominal  
30 circumference (AC) and femoral length (FL):  $\log_{10} EFW = 1,326 + 0,0107 PC + 0,0438 PA$   
31  $+ 0,158 LF + 0,00326 (PA \times LF)$  <sup>44</sup>.  
32  
33

34  
35  
36  
37  
38  
39  
40  
41  
42  
43  
44  
45  
46 • **Postnatal variables**  
47

48 The following pharmacovigilance data will be collected at birth and 3 months later in  
49 order to assess safety of the device:  
50

51 - At birth in both groups: term of birth, weight, neonatal transfer, Apgar Score and  
52 evaluation of respiratory distress by Silverman Score <sup>45</sup>.  
53

54 - Three months after birth: medical history, health problems, respiratory diseases or  
55 symptoms, liver disease or symptoms and number of hospitalization since birth.  
56  
57  
58  
59  
60



### Limitation of Bias

Use of sampling method with 5 patients per class of gestational age will limit repartition bias between control and cases. Inclusion of any pregnant women attending Besançon University maternity for the control group, and inclusion of all women with a threatened preterm labor will limit risk of selection bias. Risk of loss will be limited in the cases group between “day 0” and “day 2” because patients will remain hospitalized for corticosteroids administration. Nevertheless, risk of loss is most important between “day 2” and “day 5-7” because of possible early discharge at home after the second administration of corticosteroids. For ethical and medical reasons, cases early discharge at home cannot be convened in “day 5-7”. Risk of loss will be limited in the control group because of a financial compensation for travel expenses. To limit inter-observer variation, expert sonographers will perform elastography exams.

### Study size

Because of the paucity of data regarding SWE on human fetal lung, the sample size calculation was based on measurements of fetal lungs in pregnant baboons and extrapolations made by clinicians, with the following assumptions: average expected value of elasticity coefficient for fetal lung will be 2 KPa at 24 WG and 4 KPa at 34 WG. We hypothesized a linear increase of elasticity coefficient during pregnancy in the control group and a decrease in cases exposed to corticosteroids. At “day 2”, we therefore expect in the cases a variation of 0.2 KPa (corresponding to one week of lung maturation during gestation). Forty-two patients per group will be needed to have 90% power to statistically demonstrate such a difference (0.2 versus 0.057) assuming an  $\alpha$  risk of 0.05 and standard deviation of 0.2.

### Proposed statistical analysis

- **Technical validation:**

Feasibility will be evaluated by assessing the number of exams performed and the number of exams with interpretable results. All the variables and data that will be stored for each SWE exam are summarized in table 1. Intra and inter-observer reproducibility will be evaluated by the intra-class correlation coefficient (ICC) with 95% IC. Intra-observer

reproducibility will be calculated using the two cycles of measure, inter observer reproducibility between the operators will be calculated for means of the two cycles of measures if intra-observer is high <sup>46</sup>. Only repeatable and reproducible values of each ROI will be considered to modelize LLE ratio.

**Table 1:** Variables and data stored for each Shear Wave Elastography Exam.  
*ROI (Region of interest)*

| Maternal                                                                                       | Fetal                                                                                                                                                                                                     | Technical                                                                                                                                                                                                                                       |
|------------------------------------------------------------------------------------------------|-----------------------------------------------------------------------------------------------------------------------------------------------------------------------------------------------------------|-------------------------------------------------------------------------------------------------------------------------------------------------------------------------------------------------------------------------------------------------|
| <ul style="list-style-type: none"> <li>▪ Age (years)</li> </ul>                                | <ul style="list-style-type: none"> <li>▪ Presentation:               <ul style="list-style-type: none"> <li>- Cephalic</li> <li>- Breech</li> <li>- Transverse</li> </ul> </li> </ul>                     | <ul style="list-style-type: none"> <li>▪ Young's modulus (kPa) in 9 ROI:               <ul style="list-style-type: none"> <li>- Proximal lung: P1, P2, P3</li> <li>- Distal lung: D1, D2, D3</li> <li>- Liver: IV, V, VI</li> </ul> </li> </ul> |
| <ul style="list-style-type: none"> <li>▪ Weeks of gestation</li> </ul>                         | <ul style="list-style-type: none"> <li>▪ Estimated fetal weight (grams)</li> </ul>                                                                                                                        | <ul style="list-style-type: none"> <li>▪ Distance between probe and target ROI for each measurement (cm)</li> </ul>                                                                                                                             |
| <ul style="list-style-type: none"> <li>▪ Body mass Index (kg/m<sup>2</sup>)</li> </ul>         | <ul style="list-style-type: none"> <li>▪ Placenta:               <ul style="list-style-type: none"> <li>- Position: anterior, posterior, lateral, fundal</li> <li>- Thickness (cm)</li> </ul> </li> </ul> | <ul style="list-style-type: none"> <li>▪ Biophysical safety indices:               <ul style="list-style-type: none"> <li>- Mechanical index (Mi)</li> <li>- Thermal index (Ti)</li> </ul> </li> </ul>                                          |
| <ul style="list-style-type: none"> <li>▪ Subcutaneous adipose tissue thickness (cm)</li> </ul> | <ul style="list-style-type: none"> <li>▪ Amniotic fluid index (cm)</li> </ul>                                                                                                                             |                                                                                                                                                                                                                                                 |

- **Clinical evaluation**

Evolution of fetal lung SWE, fetal liver SWE and lung-to-liver-SWE ratio will be assessed by group and overall. Lung-to-liver-SWE Ratio will be initially defined as the value of the lung elasticity divided by the value of the liver elasticity.

SWE values before corticosteroids administration will be compared between cases and control groups. If there is a statistically significant difference, a confusional bias will have to be sought between fetal lung elasticity values and threatened preterm labor. All results will be presented as “delta” variation between two measurements in order to limit “non-comparability bias” between both groups. If corticosteroids affect fetal lung elasticity, “delta before/after” will be more important in cases than controls.



1  
2  
3 Analysis of mean differences between groups will be carried out using a Student's test or  
4 Wilcoxon test according to distribution of data for quantitative variables. Shapiro-Wilk test  
5 will be used to determine if data set is well modeled by a normal distribution. The relationship  
6 of quantitative variables to each other will be tested using Pearson's or Spearman's  
7 correlation as appropriate.  
8  
9

10  
11 Qualitative variable will be expressed as frequencies and quantitative variables will be  
12 displayed as the mean  $\pm$  SD if normally distributed or as the median  $\pm$  IQR (Inter Quartile  
13 Range) if asymmetrically distributed. Qualitative variables will be analyzed using a  $\chi^2$  test or  
14 Fisher test.  
15  
16

17  
18 For statistical analyses, the level of statistical significance will be set at 5% ( $p < 0.05$ ).  
19 Statistical analysis will be performed with statistical software SAS for Windows, version 9.4  
20 and MedCalc software, version 15.  
21  
22  
23  
24  
25  
26  
27  
28  
29  
30  
31  
32  
33  
34  
35  
36  
37  
38  
39  
40  
41  
42  
43  
44  
45  
46  
47  
48  
49  
50  
51  
52  
53  
54  
55  
56  
57  
58  
59  
60

## DISCUSSION

2D-SWE could be considered as a new noninvasive tool for monitoring fetal lung development based on evaluation of mechanical properties during pregnancy. However, standardization for measuring SWE in human fetal lung is necessary to demonstrate applicability of the technique, and to understand limiting factors. This pilot study will focus on technical performances before considering clinical applications. In this protocol, SWE will be used after fetal period of organogenesis and pharmacovigilance data will be collected at birth and 3 months later in order to assess safety of the device.

With the study design, we shall not attempt to define reference value of fetal lung elasticity during pregnancy or to correlate SWE value with respiratory function at birth. The main objective is to evaluate feasibility and reproducibility of 2D-SWE in human fetal lung between 24 and 34 WG and to modelize a new LLE ratio. Indeed, each target organ will be explored through three measurements to define the most relevant and reproducible regions with the lowest intra and inter-observer variability. Use of LLE ratio is interesting because it allows comparison between two tissues in which the liver is taken as a reference organ. Several studies indicate that liver signal or echogenicity remain constant through gestation suggestive of a regular evolution of the tissue characteristics<sup>47,48</sup>. Thus, we will compare evolution of SWE values between two organs subjected to the same technical variations, especially for depth. Both lung and liver tissue density increase during pregnancy and we expect a linear increase of SWE values of these organs. In case of variations of lung SWE values after a course of corticosteroids, LLE ratio should be modified. If we suppose that liver elasticity will be constant between two separate exams of 48h, LLE ratio will decrease if corticosteroids lead to attenuation of shear wave speed. Conversely, if lung elasticity increases after a course of corticosteroids, LLE ratio will also increase. **Finally, LLE ratio will be used to increase the reliability of the results and to standardize the study.**

One advantage of this protocol is to evaluate SWE in three tissues with different supposed biomechanical properties: normal lung, lung with increase of surfactant synthesis after corticosteroids course, and liver. Corticosteroids generate an effect model interesting for assessment of LLE's ratio variation in the cases because of a significant increase of phosphatidylcholine content in fetal lungs. This effect is mediated by an activation of choline-phosphate cytidylyltransferase<sup>37</sup>. Given the placental transfer and time to induce cellular mechanism of transcription, an artificial delay of 24h seems to be necessary to produce

1  
2  
3 surfactant in pneumocytes type 2. The benefit of corticosteroid administration is greatest at 2–  
4 7 days after the initial dose <sup>49,50</sup>. Two approaches can be proposed after a complete course of  
5 corticosteroids. On the one hand, SWE of fetal lung could increase because corticosteroids  
6 accelerate FLM, and we could expect an advanced ripening by one WG. On the other hand,  
7 increase in phospholipids content in fetal lung after corticosteroids could increase viscosity  
8 and lead to dispersion of shear wave speed and attenuation.  
9  
10

11  
12  
13  
14 Different factors will be taken into account in this study to understand variability of  
15 measures: acquisition depth, number of measurements and representative values such as  
16 median or mean values. Shear wave velocity can be different according to the acquisition  
17 depth and this parameter is gradually underestimated with increasing depth. Effect is greatest  
18 in stiff tissues but little effect is seen in soft target <sup>51-53</sup>. This phenomenon might be explained  
19 by a damping of the acoustic push pulse that generates the shear waves by both increased  
20 attenuation and increased stiffness of the target <sup>54</sup>. Thus, we expected low variation between  
21 proximal and distal lung because they may be considered as soft tissues. There are also  
22 debates about the acquisition number during SWE and the designers of the device did not  
23 provided advices. The number of measurements (NMs) reported in the recent literature on  
24 various organs is inconsistent (commonly seen are 3, 4 and 5 NMs) <sup>55-56</sup>. Quarello et al  
25 reported 3 NMs on fetal lungs in pregnant baboons and ICC for and inter observer variability  
26 were better for an average value of three measurements <sup>57</sup>. For Alison et al, 9 NMs were  
27 performed on liver in preterm neonates with intra uterine growth restriction (3 measurements  
28 from three different liver segments). Measurements showed high reproducibility on average  
29 values (ICC = 0.94–0.98 for intra-operator, 0.86 for inter-operator) <sup>31</sup>. One objective of our  
30 protocol is to determine the NM's necessary to evaluate fetal lung SWE with a good inter and  
31 intra-observer reproducibility. Thus, each value will be analyzed to determine if mean lung  
32 and liver SWE can be achieved through only 1 valid measurement or more, and if its  
33 performance is equivalent to 2 or 3 valid measurements.  
34  
35  
36  
37  
38  
39  
40  
41  
42  
43  
44  
45  
46  
47

48 To sum up, we hope that the results of this study will contribute to clarify applicability  
49 of SWE on human fetal lung between 24 and 34WG. SWE could be a new tool for reliable  
50 prediction of lung development through biomechanical properties. This study will be the first  
51 one to propose a protocol of measurement underlying limiting factors.  
52  
53  
54  
55  
56  
57  
58  
59  
60

## REFERENCES

1. Bhagwanani SG, Fahmy D, Turnbull AC. Prediction of neonatal respiratory distress by estimation of amniotic-fluid lecithin. *Lancet*. 1972;1(7743):159-62.
2. Field NT, Gilbert WM. Current status of amniotic fluid tests of fetal maturity. *Clin Obstet Gynecol*. 1997;40(2):366-86.
3. Varner S, Sherman C, Lewis D et al. Amniocentesis for Fetal Lung Maturity: Will It Become Obsolete? *Rev Obstet Gynecol*. 2013;6(3-4):126-34.
4. Maeda K, Utsu M, Yamamoto N, Serizawa M. Echogenicity of fetal lung and liver quantified by the grey-level histogram width. *Ultrasound Med Biol*. 1999;25(2):201-8.
5. Duncan KR, Gowland PA, Moore RJ et al. Assessment of fetal lung growth in utero with echo-planar MR imaging. *Radiology*. 1999;210(1):197-200.
6. Moshiri M, Mannelli L, Richardson ML et al. Fetal lung maturity assessment with MRI fetal lung-to-liver signal-intensity ratio. *AJR Am J Roentgenol*. 2013;201(6):1386-90.
7. Oka Y, Rahman M, Sasakura C et al. Prenatal diagnosis of fetal respiratory function: evaluation of fetal lung maturity using lung-to-liver signal intensity ratio at magnetic resonance imaging. *Prenat Diagn*. 2014;34(13):1289-94.
8. Gorincour G, Bach-Segura P, Ferry-Juquin M et al. Lung signal on fetal MRI: normal values and usefulness for congenital diaphragmatic hernia. *J Radiol*. 2009;90(1 Pt 1):53-8.
9. Beck APA, Araujo Júnior E, Leslie ATFS et al. Assessment of fetal lung maturity by ultrasound: objective study using gray-scale histogram. *J Matern-Fetal Neonatal Med*. 2015;28(6):617-22.
10. Fried AM, Loh FK, Umer MA, et al. Echogenicity of fetal lung: relation to fetal age and maturity. *AJR Am J Roentgenol*. 1985;145(3):591-4.
11. Serizawa M, Maeda K. Noninvasive fetal lung maturity prediction based on ultrasonic gray level histogram width. *Ultrasound Med Biol*. 2010;36(12):1998-2003.
12. Prakash KNB, Ramakrishnan AG, Suresh S, Chow TWP. Fetal lung maturity analysis using ultrasound image features. *IEEE*. 2002;6(1):38-45.
13. Bonet-Carne E, Palacio M, Cobi T et al. Quantitative ultrasound texture analysis of fetal lungs to predict neonatal respiratory morbidity. *Ultrasound Obstet Gynecol* 2015;45(4):427-33.
14. Palacio M, Bonet-Carne E, Cobo T et al. Prediction of neonatal respiratory morbidity by quantitative ultrasound lung texture analysis: a multicenter study. *Am J Obstet Gynecol*. 2017; Epub ahead of print.
15. Cannie M, Jani J, Meerschaert J, et al. Prenatal prediction of survival in isolated diaphragmatic hernia using observed to expected total fetal lung volume determined by

- 1  
2  
3 magnetic resonance imaging based on either gestational age or fetal body volume.  
4 *Ultrasound Obstet Gynecol.* 2008;32(5):633-9.
- 5  
6 16. Kastenholz KE, Weis M, Hagelstein C, et al. Correlation of Observed-to-Expected MRI  
7 Fetal Lung Volume and Ultrasound Lung-to-Head Ratio at Different Gestational Times  
8 in Fetuses With Congenital Diaphragmatic Hernia. *AJR Am J Roentgenol.*  
9 2016;206(4):856-66.
- 10  
11 17. Kehl S, Becker L, Eckert S et al. Prediction of mortality and the need for neonatal  
12 extracorporeal membrane oxygenation therapy by 3-dimensional sonography and  
13 magnetic resonance imaging in fetuses with congenital diaphragmatic hernias. *J*  
14 *Ultrasound Med.* 2013;32(6):981-8.
- 15  
16 18. Strizek B, Cos Sanchez T, Khalifé J, et al. Impact of operator experience on the  
17 variability of fetal lung volume estimation by 3D-ultrasound (VOCAL) and magnetic  
18 resonance imaging in fetuses with congenital diaphragmatic hernia. *J Matern-Fetal*  
19 *Neonatal Med.* 2015;28(7):858-64.
- 20  
21 19. Rubesova E. Why do we need more data on MR volumetric measurements of the fetal  
22 lung? *Pediatr Radiol.* 2016;46(2):167-71.
- 23  
24 20. Bercoff J, Pernot M, Tanter M, et al. Monitoring thermally-induced lesions with  
25 supersonic shear imaging. *Ultrason Imaging.* 2004;26(2):71-84.
- 26  
27 21. Erkan M, Canberk S, Kilicoglu GZ, et al. Avoidance of unnecessary fine-needle  
28 aspiration with the use of the Thyroid Imaging, Reporting Data System classification  
29 and strain elastography based on The Bethesda System for Reporting Thyroid  
30 Cytopathology. *Mol Clin Oncol.* 2016;5(5):625-30.
- 31  
32 22. Rouvière O, Melodelima C, Hoang Dinh A, et al. Stiffness of benign and malignant  
33 prostate tissue measured by shear-wave elastography: a preliminary study. *Eur Radiol.*  
34 août 2016; 27(5):1858-1866.
- 35  
36 23. Denis M, Gregory A, Bayat M, et al. Correlating Tumor Stiffness with  
37 Immunohistochemical Subtypes of Breast Cancers: Prognostic Value of Comb-Push  
38 Ultrasound Shear Elastography for Differentiating Luminal Subtypes. *PLoS One.*  
39 2016;11(10):e0165003.
- 40  
41 24. Menten R, Leonard A, Clapuyt P et al. Transient elastography in patients with cystic  
42 fibrosis. *Pediatr Radiol.* 2010;40(7):1231-5.
- 43  
44 25. Li C, Zhang C, Li J, Cao X, Song D. An Experimental Study of the Potential Biological  
45 Effects Associated with 2-D Shear Wave Elastography on the Neonatal Brain.  
46 *Ultrasound Med Biol.* 2016;42(7):1551-9.
- 47  
48 26. Fowlkes JB, Bioeffects Committee of the American Institute of Ultrasound in Medicine.  
49 American Institute of Ultrasound in Medicine consensus report on potential bioeffects of  
50 diagnostic ultrasound: executive summary. *J Ultrasound Med.* 2008;27(4):503-15.
- 51  
52 27. Herman BA, Harris GR. Models and regulatory considerations for transient temperature  
53 rise during diagnostic ultrasound pulses. *Ultrasound Med Biol.* 2002; 28:1217-1224
- 54  
55  
56  
57  
58  
59  
60

- 1
  - 2
  - 3
  - 4
  - 5
  - 6
  - 7
  - 8
  - 9
  - 10
  - 11
  - 12
  - 13
  - 14
  - 15
  - 16
  - 17
  - 18
  - 19
  - 20
  - 21
  - 22
  - 23
  - 24
  - 25
  - 26
  - 27
  - 28
  - 29
  - 30
  - 31
  - 32
  - 33
  - 34
  - 35
  - 36
  - 37
  - 38
  - 39
  - 40
  - 41
  - 42
  - 43
  - 44
  - 45
  - 46
  - 47
  - 48
  - 49
  - 50
  - 51
  - 52
  - 53
  - 54
  - 55
  - 56
  - 57
  - 58
  - 59
  - 60
28. Palmeri ML, Frinkley KD, Nightingale KR. Experimental studies of the thermal effects associated with radiation force imaging of soft tissue. *Ultrasound Imaging*. 2004; 26: 100–114.
29. Karaman E. Response to ‘Safety of elastography applied to the placenta: Be careful with ultrasound radiation force’. *J. Obst. Gynaecol. Res* 2017. Epub ahead of print.
30. Quarello E, Lacoste R, Mancini J et al. Feasibility and reproducibility of ShearWave(TM) elastography of fetal baboon organs. *Prenat Diagn*. 2015; 35(11):1112-6.
31. Alison M, Biran V, Tanase A, Bendavid M, et al. Quantitative Shear-Wave Elastography of the Liver in Preterm Neonates with Intra-Uterine Growth Restriction. *PloS One*. 2015;10(11):e0143220.
32. Hanquinet S, Rougemont A-L, Courvoisier D, et al. Acoustic radiation force impulse (ARFI) elastography for the noninvasive diagnosis of liver fibrosis in children. *Pediatr Radiol*. 2013;43(5):545–51.
33. Hanquinet S, Courvoisier DS, Rougemont A-L et al. Contribution of acoustic radiation force impulse (ARFI) elastography to the ultrasound diagnosis of biliary atresia. *Pediatr Radiol*. 2015;45(10):1489–95.
34. Kim HG, Park MS, Lee J-D, Park SY. Ultrasound Elastography of the Neonatal Brain: Preliminary Study. *J Ultrasound Med*. 17 mars 2017; [Epub ahead of print]
35. Su Y, Ma J, Du L, et al. Application of acoustic radiation force impulse imaging (ARFI) in quantitative evaluation of neonatal brain development. *Clin Exp Obstet Gynecol*. 2015;42(6):797–800.
36. Bailey C, Huisman TAGM, de Jong RM, et al. Contrast-Enhanced Ultrasound and Elastography Imaging of the Neonatal Brain: A Review. *J Neuroimaging*. 2017; [Epub ahead of print]
37. Post M, Barsoumian A, Smith BT. The cellular mechanism of glucocorticoid acceleration of fetal lung maturation. Fibroblast-pneumonocyte factor stimulates choline-phosphate cytidylyltransferase activity. *J Biol Chem*. 1986;261(5):2179–84.
38. Rapport de la Conférence Nationale en Echographie Obstetricale et Fœtale. L’echographie de dépistage prénatal CNEOF . 14 juillet 2016 [Internet]. available at: <http://www.cfef.org/archives/bricabrac/cneof/rapportcneof2016.pdf>
39. Noah N. The STROBE initiative: STrengthening the Reporting of OBServational studies in Epidemiology (STROBE). *Epidemiol Infect*. 2008;136(7):865.
40. World Medical Association. World Medical Association Declaration of Helsinki: ethical principles for medical research involving human subjects. *JAMA*. 2013;310(20):2191–4.
41. Maillols-Perroy A-C, Tillet Y. [The adoption of Jardé law modifies the legal framework of clinical research in France]. *Therapie*. avr 2012;67(2):77–87.
42. Franchi-Abella S, Corno L, Gonzales E, et al. Feasibility and Diagnostic Accuracy of



- 1  
2  
3  
4  
5  
6  
7  
8  
9  
10  
11  
12  
13  
14  
15  
16  
17  
18  
19  
20  
21  
22  
23  
24  
25  
26  
27  
28  
29  
30  
31  
32  
33  
34  
35  
36  
37  
38  
39  
40  
41  
42  
43  
44  
45  
46  
47  
48  
49  
50  
51  
52  
53  
54  
55  
56  
57  
58  
59  
60
- Supersonic Shear-Wave Elastography for the Assessment of Liver Stiffness and Liver Fibrosis in Children: A Pilot Study of 96 Patients. *Radiology*. 2016;278(2):554-62.
43. Song P, Macdonald MC, Behler RH, et al. Two-dimensional Shear Wave Elastography on Conventional Ultrasound Scanners with Time Aligned Sequential Tracking (TAST) and Comb-push Ultrasound Shear Elastography (CUSE). *Trans Ultrason Ferroelectr Freq Control*. 2015;62(2):290.
44. Hadlock FP, Harrist RB, Carpenter RJ, et al. Sonographic estimation of fetal weight. The value of femur length in addition to head and abdomen measurements. *Radiology*. 1984;150(2):535-40.
45. Silverman WA, Andersen DH. A controlled clinical trial of effects of water mist on obstructive respiratory signs, death rate and necropsy findings among premature infants. *Pediatrics*. 1956;17(1):1-10.
46. Bland JM, Altman DG. Statistical methods for assessing agreement between two methods of clinical measurement. *Lancet*. 1986;1(8476):307-10.
47. Dubinsky T, Moshiri M, Waldorf KA, et al. Increased fetal lung T2 signal is not due to increasing surfactant concentration: an in vitro T2 mapping analysis. *Prenat Diagn*. 2017. 37(3):211-214
48. Mills M, Winter TC, Kennedy AM, et al. Determination of fetal lung maturity using magnetic resonance imaging signal intensity measurements. *Ultrasound Q*. 2014;30(1):61-7.
49. Mulder EJ, Derks JB, Visser GH. Antenatal corticosteroid therapy and fetal behaviour: a randomised study of the effects of betamethasone and dexamethasone. *Br J Obstet Gynaecol*. 1997;104(11):1239-47.
50. Loehle M, Schwab M, Kadner MS, et al. Dose-response effects of betamethasone on maturation of the fetal sheep lung. *Am J Obstet Gynecol*. 2010;202(2):186.e1.
51. Shin N-Y, Kim M-J, Lee M-J, et al. Transient elastography and sonography for prediction of liver fibrosis in infants with biliary atresia. *J Ultrasound Med*. 2014;33(5):853-64.
52. Tang A, Cloutier G, Szeverenyi NM, et al. Ultrasound Elastography and MR Elastography for Assessing Liver Fibrosis: Part 1, Principles and Techniques. *Am J Roentgenol*. 2015;205(1):22.
53. Carlsen JF, Pedersen MR, Ewertsen C, et al. A comparative study of strain and shear-wave elastography in an elasticity phantom. *Am J Roentgenol*. 2015;204(3):W236-242.
54. Tozaki M, Saito M, Joo C, et al. Ultrasonographic tissue quantification of the breast using acoustic radiation force impulse technology: phantom study and clinical application. *Jpn J Radiol*. 2011;29(8):598-603.
55. Ling W, Lu Q, Quan J, et al. Assessment of impact factors on shear wave based liver stiffness measurement. *Eur J Radiol*. 2013;82(2):335-41.

1  
2  
3  
4  
5  
6  
7  
8  
9  
10  
11  
12  
13  
14  
15  
16  
17  
18  
19  
20  
21  
22  
23  
24  
25  
26  
27  
28  
29  
30  
31  
32  
33  
34  
35  
36  
37  
38  
39  
40  
41  
42  
43  
44  
45  
46  
47  
48  
49  
50  
51  
52  
53  
54  
55  
56  
57  
58  
59  
60

56. Grenier N, Gennisson J-L, Cornelis F, et al. Renal ultrasound elastography. *Diagn Interv Imaging*. 2013;94(5):545-50.

57. Quarello E, Lacoste R, Mancini J, et al. ShearWave elastography of fetal lungs in pregnant baboons. *Diagn Interv Imaging*. 2016;97(6):605-10.

For peer review only



1  
2  
3 **Figure 1:** (a) B-mode image of the fetal thorax centered on a 4-chamber view of the fetal  
4 heart, using an abdominal convex probe 1-6 MHz. (b) Elastogram of the fetal thorax showing  
5 a color-coded elasticity map: blue identifies deformable tissue and red indicates rigid tissues  
6 (kPa).  
7  
8  
9

10 **Figure 2:** Design of the study.  
11  
12

13 **Figure 3:** Measurement sites with 2D comb-push SWE using an abdominal convex probe 1-6  
14 MHz (C1-6-D probe). Color scale ranging from 0 to 48 kPa. Sufficient color maps covering  
15 more than 50% of the sampling area are obtained considered as a technical success. Regions  
16 of interest (ROI) are placed on homogeneous elastograms:  
17  
18  
19

- 20 - (a,b) 3 measurements on the proximal lung (anterior “P1”, medium “P2” and posterior  
21 portion “P3”)  
22
- 23 - (a,c) 3 measurements on the distal lung (anterior “D1”, medium “D2” and posterior  
24 portion “D3”)  
25
- 26 - (d-f) 3 measurements on 3 liver segments (IV, V, VI)  
27

28 Operator will perform 2 cycles of 9 Young’s modulus measurements while systematically  
29 repositioning the probe and each target ROI.  
30  
31  
32

33 **Figure 4:** 2D comb-push SWE on proximal fetal lung. Color scale ranging from 0 to 48 kPa.  
34 On image (a), elastogram is not homogeneous and is degraded by artifact on the left side due  
35 to rib shadowing. By moving the probe to another location, a more homogeneous elastogram  
36 (b) is obtained allowing measurement.  
37  
38  
39  
40  
41  
42  
43  
44  
45  
46  
47  
48  
49  
50  
51  
52  
53  
54  
55  
56  
57  
58  
59  
60

1  
2  
3  
4  
5  
6  
7  
8  
9  
10  
11  
12  
13  
14  
15  
16  
17  
18  
19  
20  
21  
22  
23  
24  
25  
26  
27  
28  
29  
30  
31  
32  
33  
34  
35  
36  
37  
38  
39  
40  
41  
42  
43  
44  
45  
46  
47  
48  
49  
50  
51  
52  
53  
54  
55  
56  
57  
58  
59  
60

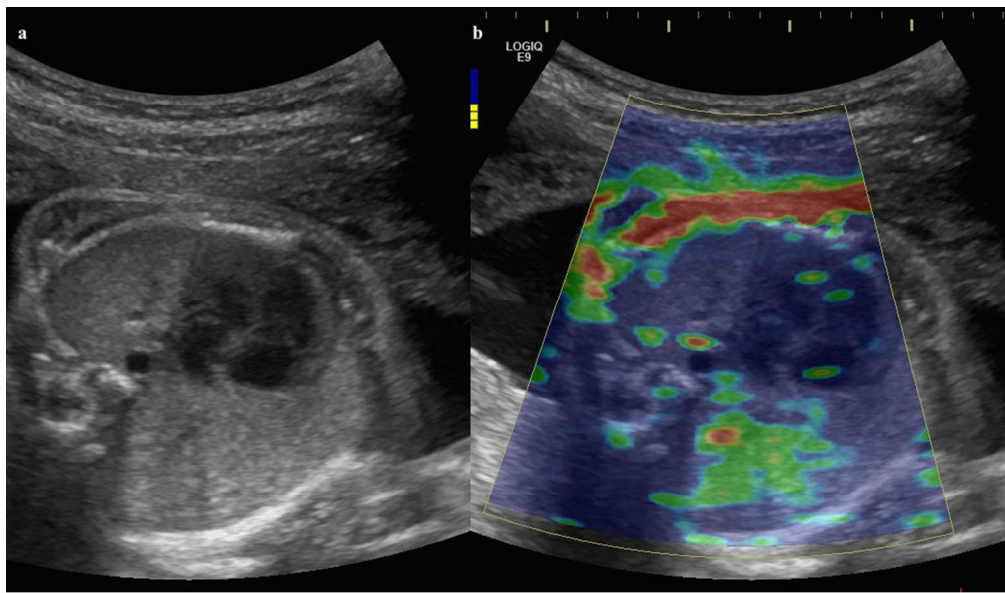

(a) B-mode image of the fetal thorax centered on a 4-chamber view of the fetal heart, using an abdominal convex probe 1-6 MHz. (b) Elastogram of the fetal thorax showing a color-coded elasticity map: blue identifies deformable tissue and red indicates rigid tissues (kPa).

88x51mm (300 x 300 DPI)

Review only

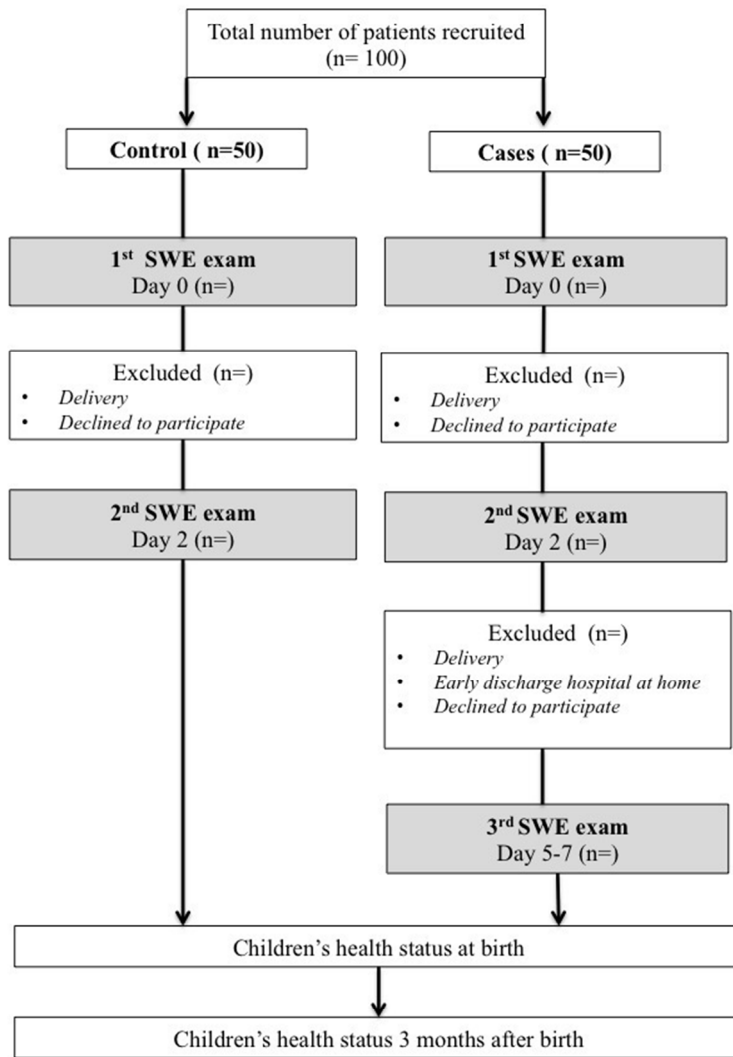

Design of the study.

60x81mm (300 x 300 DPI)

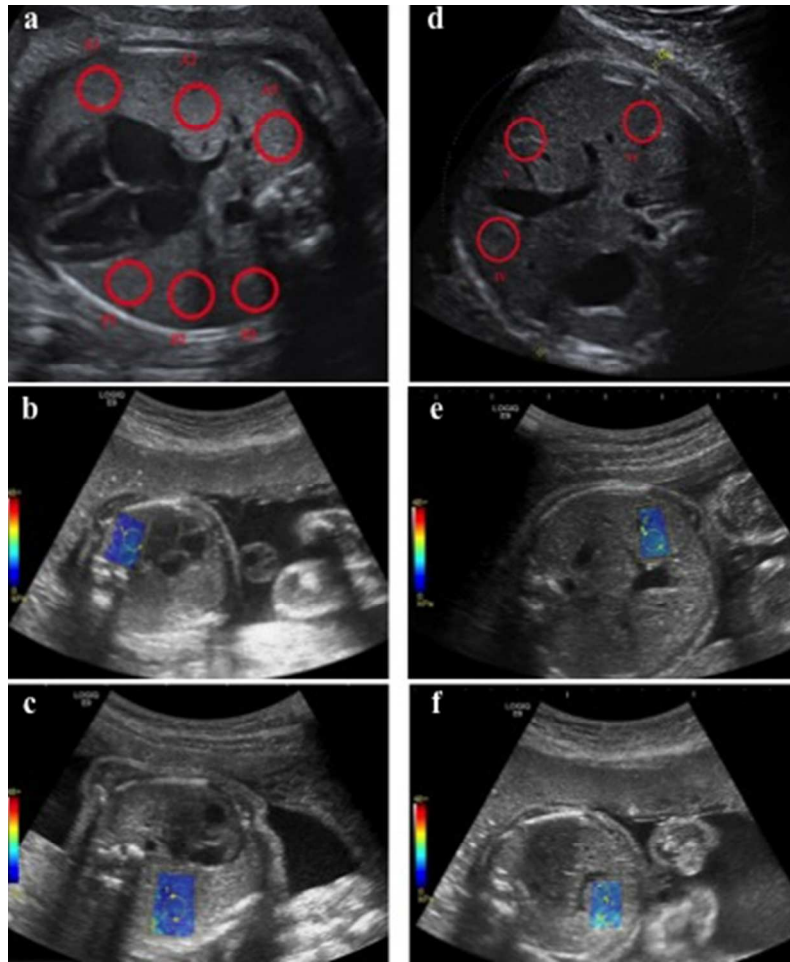

Measurement sites with 2D comb-push SWE using an abdominal convex probe 1-6 MHz (C1-6-D probe). Color scale ranging from 0 to 48 kPa. Sufficient color maps covering more than 50% of the sampling area are obtained considered as a technical success. Regions of interest (ROI) are placed on homogeneous elastograms:

- (a,b) 3 measurements on the proximal lung (anterior "P1", medium "P2" and posterior portion "P3")
- (a,c) 3 measurements on the distal lung (anterior "D1", medium "D2" and posterior portion "D3")
- (d-f) 3 measurements on 3 liver segments (IV, V, VI)

Operator will perform 2 cycles of 9 Young's modulus measurements while systematically repositioning the probe and each target ROI.

33x40mm (300 x 300 DPI)



2D comb-push SWE on proximal fetal lung. Color scale ranging from 0 to 48 kPa. On image (a), elastogram is not homogeneous and is degraded by artifact on the left side due to rib shadowing. By moving the probe to another location, a more homogeneous elastogram (b) is obtained allowing measurement.

31x43mm (300 x 300 DPI)

STROBE 2007 (v4) Statement—Checklist of items that should be included in reports of *case-control studies*

| Section/Topic             | Item # | Recommendation                                                                                                                                                                       | Reported on page # |
|---------------------------|--------|--------------------------------------------------------------------------------------------------------------------------------------------------------------------------------------|--------------------|
| Title and abstract        | 1      | (a) Indicate the study’s design with a commonly used term in the title or the abstract                                                                                               | 3                  |
|                           |        | (b) Provide in the abstract an informative and balanced summary of what was done and what was found                                                                                  | 3                  |
| <b>Introduction</b>       |        |                                                                                                                                                                                      |                    |
| Background/rationale      | 2      | Explain the scientific background and rationale for the investigation being reported                                                                                                 | 4                  |
| Objectives                | 3      | State specific objectives, including any prespecified hypotheses                                                                                                                     | 5,6                |
| <b>Methods</b>            |        |                                                                                                                                                                                      |                    |
| Study design              | 4      | Present key elements of study design early in the paper                                                                                                                              | 8                  |
| Setting                   | 5      | Describe the setting, locations, and relevant dates, including periods of recruitment, exposure, follow-up, and data collection                                                      | 8                  |
| Participants              | 6      | (a) Give the eligibility criteria, and the sources and methods of case ascertainment and control selection. Give the rationale for the choice of cases and controls                  | 8,9                |
|                           |        | (b) For matched studies, give matching criteria and the number of controls per case                                                                                                  |                    |
| Variables                 | 7      | Clearly define all outcomes, exposures, predictors, potential confounders, and effect modifiers. Give diagnostic criteria, if applicable                                             | 9,10               |
| Data sources/ measurement | 8*     | For each variable of interest, give sources of data and details of methods of assessment (measurement). Describe comparability of assessment methods if there is more than one group | 9,10,11            |
| Bias                      | 9      | Describe any efforts to address potential sources of bias                                                                                                                            | 11                 |
| Study size                | 10     | Explain how the study size was arrived at                                                                                                                                            | 11                 |
| Quantitative variables    | 11     | Explain how quantitative variables were handled in the analyses. If applicable, describe which groupings were chosen and why                                                         | 11,12              |
| Statistical methods       | 12     | (a) Describe all statistical methods, including those used to control for confounding                                                                                                | 12                 |
|                           |        | (b) Describe any methods used to examine subgroups and interactions                                                                                                                  | 12                 |
|                           |        | (c) Explain how missing data were addressed                                                                                                                                          | 12                 |
|                           |        | (d) If applicable, explain how matching of cases and controls was addressed                                                                                                          | 12                 |
|                           |        | (e) Describe any sensitivity analyses                                                                                                                                                | 12                 |
| <b>Results</b>            |        |                                                                                                                                                                                      | 12                 |

1  
2  
3  
4  
5  
6  
7  
8  
9  
10  
11  
12  
13  
14  
15  
16  
17  
18  
19  
20  
21  
22  
23  
24  
25  
26  
27  
28  
29  
30  
31  
32  
33  
34  
35  
36  
37  
38  
39  
40  
41  
42  
43  
44  
45  
46  
47  
48  
49

|                          |     |                                                                                                                                                                                                              |     |
|--------------------------|-----|--------------------------------------------------------------------------------------------------------------------------------------------------------------------------------------------------------------|-----|
| Participants             | 13* | (a) Report numbers of individuals at each stage of study—eg numbers potentially eligible, examined for eligibility, confirmed eligible, included in the study, completing follow-up, and analysed            | 8,9 |
|                          |     | (b) Give reasons for non-participation at each stage                                                                                                                                                         | 10  |
|                          |     | (c) Consider use of a flow diagram                                                                                                                                                                           | 10  |
| Descriptive data         | 14* | (a) Give characteristics of study participants (eg demographic, clinical, social) and information on exposures and potential confounders                                                                     | 8,9 |
|                          |     | (b) Indicate number of participants with missing data for each variable of interest                                                                                                                          |     |
| Outcome data             | 15* | Report numbers in each exposure category, or summary measures of exposure                                                                                                                                    |     |
| Main results             | 16  | (a) Give unadjusted estimates and, if applicable, confounder-adjusted estimates and their precision (eg, 95% confidence interval). Make clear which confounders were adjusted for and why they were included |     |
|                          |     | (b) Report category boundaries when continuous variables were categorized                                                                                                                                    |     |
|                          |     | (c) If relevant, consider translating estimates of relative risk into absolute risk for a meaningful time period                                                                                             |     |
| Other analyses           | 17  | Report other analyses done—eg analyses of subgroups and interactions, and sensitivity analyses                                                                                                               |     |
| <b>Discussion</b>        |     |                                                                                                                                                                                                              |     |
| Key results              | 18  | Summarise key results with reference to study objectives                                                                                                                                                     | 13  |
| Limitations              | 19  | Discuss limitations of the study, taking into account sources of potential bias or imprecision. Discuss both direction and magnitude of any potential bias                                                   | 15  |
| Interpretation           | 20  | Give a cautious overall interpretation of results considering objectives, limitations, multiplicity of analyses, results from similar studies, and other relevant evidence                                   | 14  |
| Generalisability         | 21  | Discuss the generalisability (external validity) of the study results                                                                                                                                        | 14  |
| <b>Other information</b> |     |                                                                                                                                                                                                              |     |
| Funding                  | 22  | Give the source of funding and the role of the funders for the present study and, if applicable, for the original study on which the present article is based                                                | 2   |

\*Give information separately for cases and controls in case-control studies and, if applicable, for exposed and unexposed groups in cohort and cross-sectional studies.

**Note:** An Explanation and Elaboration article discusses each checklist item and gives methodological background and published examples of transparent reporting. The STROBE checklist is best used in conjunction with this article (freely available on the Web sites of PLoS Medicine at <http://www.plosmedicine.org/>, Annals of Internal Medicine at <http://www.annals.org/>, and Epidemiology at <http://www.epidem.com/>). Information on the STROBE Initiative is available at [www.strobe-statement.org](http://www.strobe-statement.org).
